# Supplementary material for: Rh-catalysed direct cyclisation of 1,4-naphthoquinone and 9,10-phenanthraquinone with alkyne: facile access to 1,8-dioxapyrenes and 1,12-dioxaperylenes as orange and red-emitting luminophores
Source: Royal Society of Chemistry journal article supplement (doi:10.1039/c5cc00312a), 2015-01-01

## *Supporting Information*

# **Rh-catalysed direct cyclisation of 1,4-naphthoquinone and 9,10-phenanthraquinone with alkyne: a facile access to 1,8-dioxapyrenes and 1,12-dioxaperylenes as orange and red-emitting luminophores**

Jing Wang, Dekun Qin, Jingbo Lan,\* Yangyang Cheng, Shuai Zhang, Qiang Guo, Jie Wu, Di Wu  
and Jingsong You\*

*Key Laboratory of Green Chemistry and Technology of Ministry of Education, College of Chemistry,  
and State Key Laboratory of Biotherapy, West China Medical School, Sichuan University, 29  
Wangjiang Road, Chengdu 610064, PR China*

*Fax: 86-28-85412203; E-mail: [jingbolan@scu.edu.cn](mailto:jingbolan@scu.edu.cn); [jsyou@scu.edu.cn](mailto:jsyou@scu.edu.cn)*

## Table of Contents

|                                                                                                                      |     |
|----------------------------------------------------------------------------------------------------------------------|-----|
| <b>I.</b> General remarks.....                                                                                       | S3  |
| <b>II.</b> Optimization of the Rh-catalysed direct cyclisation of 1,4-naphthoquinone with 1,2-diphenylacetylene..... | S3  |
| <b>III.</b> General procedure for the Rh-catalysed direct cyclisation of quinones with alkynes.....                  | S4  |
| <b>IV.</b> Proposed catalytic pathway.....                                                                           | S4  |
| <b>V.</b> Single crystal X-ray structure of compound <b>3q</b> .....                                                 | S5  |
| <b>VI.</b> Photophysical properties of 1,8-dioxapyrenes and 1,12-dioxaperylenes.....                                 | S5  |
| <b>VII.</b> Cyclic voltammograms of <b>3d</b> , <b>3i</b> and <b>3q</b> .....                                        | S8  |
| <b>VIII.</b> TGA curves of <b>3d</b> , <b>3i</b> and <b>3q</b> .....                                                 | S8  |
| <b>IX.</b> Characterization data for the products.....                                                               | S9  |
| <b>X.</b> References.....                                                                                            | S19 |
| <b>XI.</b> Copies of <sup>1</sup> H and <sup>13</sup> C NMR spectra.....                                             | S20 |

## I. General Remarks

NMR spectra were recorded on a Bruker AMX-400 spectrometer. The  $^1\text{H}$  NMR (400 MHz) chemical shifts were reported relative to  $\text{CDCl}_3$  as the internal reference ( $\text{CDCl}_3$ :  $\delta = 7.26$  ppm). The  $^{13}\text{C}$  NMR (100 MHz) chemical shifts were given using  $\text{CDCl}_3$  as the internal standard ( $\text{CDCl}_3$ :  $\delta = 77.16$  ppm). High-resolution mass spectra (HRMS) were obtained with a Waters-Q-TOF-Premier (ESI). Melting points were determined with XRC-1 and are uncorrected. X-Ray single-crystal diffraction data were collected on an Oxford Xcalibur E CCD area-detector diffractometer. Thermogravimetric analysis (TGA) was carried out using NETZSCH TG 209F1 Iris at a heating rate of  $10\text{ }^\circ\text{C}\cdot\text{min}^{-1}$  under  $\text{N}_2$  atmosphere. Absorption spectra were recorded on HITACHI U-2910 spectrophotometer. Fluorescence spectra and absolute quantum yields were collected on a Horiba Jobin Yvon-Edison Fluoromax-4 fluorescence spectrometer with a calibrated integrating sphere system. Elemental analysis data were obtained on EA FLASH 1112 SERIES.

Unless otherwise noted, all reagents were obtained from commercial suppliers and used without further purification.  $[\text{RhCp}^*\text{Cl}_2]_2$ ,<sup>1</sup> alkynes<sup>2</sup> and quinones<sup>3-6</sup> were prepared according to the literature procedures. DCE was dried by refluxing over  $\text{CaH}_2$ , and freshly distilled prior to use.

## II. Optimization of the Rh-catalysed direct cyclisation of 1,4-naphthoquinone with 1,2-diphenylacetylene

**Table S1.** Optimization of the direct cyclisation of 1,4-naphthoquinone with 1,2-diphenylacetylene<sup>a</sup>

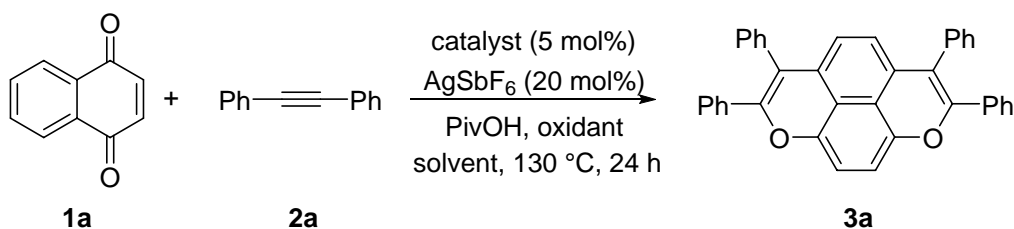

| Entry           | Catalyst                                    | Oxidant (equiv)                 | Solvent (mL)      | Yield <sup>b</sup> |
|-----------------|---------------------------------------------|---------------------------------|-------------------|--------------------|
| 1 <sup>c</sup>  | $\text{Pd}(\text{OAc})_2$                   | $\text{Cu}(\text{OAc})_2$ (2.0) | 1,4-dioxane (1.0) | -                  |
| 2               | $[\text{RhCp}^*\text{Cl}_2]_2$              | $\text{Cu}(\text{OAc})_2$ (2.0) | 1,4-dioxane (1.0) | 23%                |
| 3               | $[\text{Rh}(\text{cod})\text{Cl}]_2$        | $\text{Cu}(\text{OAc})_2$ (2.0) | 1,4-dioxane (1.0) | -                  |
| 4               | $[\text{Ru}(p\text{-cymene})\text{Cl}_2]_2$ | $\text{Cu}(\text{OAc})_2$ (1.0) | 1,4-dioxane (1.0) | 16%                |
| 5               | -                                           | $\text{Cu}(\text{OAc})_2$ (2.0) | 1,4-dioxane (1.0) | -                  |
| 6               | $[\text{RhCp}^*\text{Cl}_2]_2$              | $\text{Cu}(\text{OAc})_2$ (1.0) | 1,4-dioxane (1.0) | 28%                |
| 7               | $[\text{RhCp}^*\text{Cl}_2]_2$              | $\text{Cu}(\text{OAc})_2$ (1.0) | 1,4-dioxane (0.5) | 43%                |
| 8               | $[\text{RhCp}^*\text{Cl}_2]_2$              | $\text{Cu}(\text{OAc})_2$ (0.5) | 1,4-dioxane (0.5) | 30%                |
| 9               | $[\text{RhCp}^*\text{Cl}_2]_2$              | $\text{Cu}(\text{OAc})_2$ (1.0) | 1,4-dioxane (0.3) | 21%                |
| 10 <sup>d</sup> | $[\text{RhCp}^*\text{Cl}_2]_2$              | $\text{Cu}(\text{OAc})_2$ (1.0) | 1,4-dioxane (0.5) | trace              |

|                   |                                      |                             |                   |       |
|-------------------|--------------------------------------|-----------------------------|-------------------|-------|
| 11                | [RhCp*Cl <sub>2</sub> ] <sub>2</sub> | Cu(TFA) <sub>2</sub> (1.0)  | 1,4-dioxane (0.5) | -     |
| 12                | [RhCp*Cl <sub>2</sub> ] <sub>2</sub> | Cu(OPiv) <sub>2</sub> (1.0) | 1,4-dioxane (0.5) | 22%   |
| 13                | [RhCp*Cl <sub>2</sub> ] <sub>2</sub> | BQ (1.0)                    | 1,4-dioxane (0.5) | -     |
| 14                | [RhCp*Cl <sub>2</sub> ] <sub>2</sub> | Cu(OAc) <sub>2</sub> (1.0)  | DMF (0.5)         | -     |
| 15                | [RhCp*Cl <sub>2</sub> ] <sub>2</sub> | Cu(OAc) <sub>2</sub> (1.0)  | toluene (0.5)     | -     |
| 16                | [RhCp*Cl <sub>2</sub> ] <sub>2</sub> | Cu(OAc) <sub>2</sub> (1.0)  | DCE (0.5)         | 30%   |
| 17 <sup>e</sup>   | [RhCp*Cl <sub>2</sub> ] <sub>2</sub> | Cu(OAc) <sub>2</sub> (1.0)  | DCE (0.5)         | 54%   |
| 18 <sup>e</sup>   | [RhCp*Cl <sub>2</sub> ] <sub>2</sub> | -                           | DCE (0.5)         | trace |
| 19 <sup>e,f</sup> | [RhCp*Cl <sub>2</sub> ] <sub>2</sub> | -                           | DCE (0.5)         | 10%   |
| 20 <sup>e</sup>   | [RhCp*Cl <sub>2</sub> ] <sub>2</sub> | Cu(OAc) <sub>2</sub> (1.0)  | 1,4-dioxane (0.5) | 24%   |

<sup>a</sup> Reaction conditions: **1a** (0.1 mmol), **2a** (3.0 equiv), catalyst (5 mol%), AgSbF<sub>6</sub> (20 mol%), oxidant, PivOH (2.0 equiv), solvent, 130 °C, 24 h. <sup>b</sup> Yields of isolated products. <sup>c</sup> Without AgSbF<sub>6</sub>. <sup>d</sup> AgOTf was used instead of AgSbF<sub>6</sub>. <sup>e</sup> Without PivOH. <sup>f</sup> [RhCp\*Cl<sub>2</sub>]<sub>2</sub> (0.1 mmol), NaOAc (2.0 equiv). PivOH = trimethylacetic acid, BQ = 1,4-benzoquinone, DMF = dimethyl formamide, DCE = 1,2-dichloroethane.

### III. General procedure for the Rh-catalysed direct cyclisation of quinones with alkynes

A dry Schlenck tube with a magnetic stir bar was charged with 1,4-naphthoquinone (**1**) or 9,10-phenanthraquinone (**4**) (0.1 mmol, 1.0 equiv), alkyne (**2**) (0.3 mmol, 3.0 equiv), [RhCp\*Cl<sub>2</sub>]<sub>2</sub> (3 mg, 5 mol%), AgSbF<sub>6</sub> (6.8 mg, 20 mol%), Cu(OAc)<sub>2</sub> (0.1 mmol, 1.0 equiv) and DCE (0.5 mL). The reaction mixture was stirred under an N<sub>2</sub> atmosphere at 130 °C for 24 h in an oil bath. The resulting solution was subsequently diluted with 5 mL of dichloromethane, filtered through a celite pad and washed with 10-20 mL of dichloromethane. The combined organic phases were evaporated, and the resulting residue was purified by column chromatography on silica gel to provide the desired product **3** or **5**.

### IV. Proposed catalytic pathway

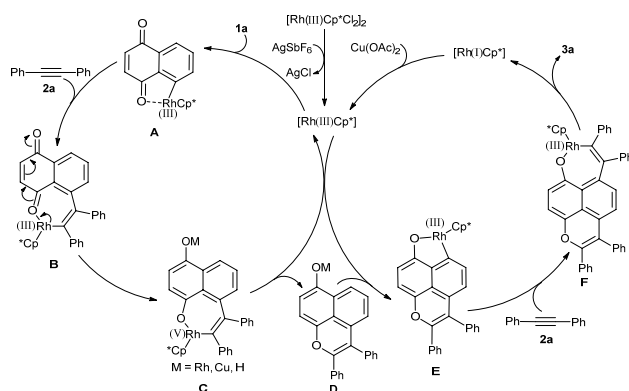

**Scheme S1.** Proposed catalytic pathway

## V. Single crystal X-ray structure of compound **3q**

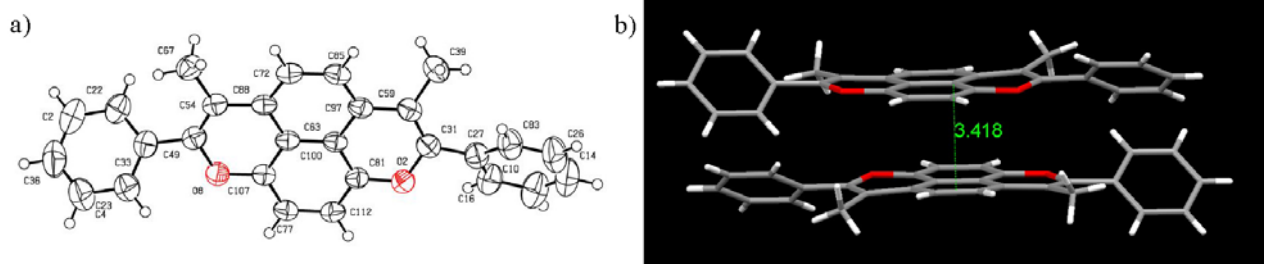

**Fig. S1.** (a) ORTEP diagram of compound **3q** (CCDC-1041752). Thermal ellipsoids are set at the 50% probability. (b) Intermolecular  $\pi$ - $\pi$  stacking interaction.

## VI. Photophysical properties of 1,8-dioxapyrenes and 1,12-dioxaperylenes

### 1. **Table S2.** Absorption and emission spectroscopic data

| Comp      | In CH <sub>2</sub> Cl <sub>2</sub> Solution |                              |                                  |                         | In Solid State               |                         |
|-----------|---------------------------------------------|------------------------------|----------------------------------|-------------------------|------------------------------|-------------------------|
|           | $\lambda_{\text{abs}}^a$ (nm)               | $\lambda_{\text{em}}^b$ (nm) | Stokes Shift (cm <sup>-1</sup> ) | $\Phi_{\text{F}}^c$ (%) | $\lambda_{\text{em}}^d$ (nm) | $\Phi_{\text{F}}^e$ (%) |
| <b>3a</b> | 490                                         | 585                          | 3314                             | < 0.10                  | 651                          | 4.21                    |
| <b>3b</b> | 497                                         | 590                          | 3172                             | 2.13                    | 654                          | 0.48                    |
| <b>3c</b> | 497                                         | 591                          | 3200                             | 3.08                    | 640                          | 2.88                    |
| <b>3d</b> | 492                                         | 580                          | 3084                             | 7.58                    | 643                          | 2.46                    |
| <b>3e</b> | 498                                         | 594                          | 3245                             | 2.12                    | 653                          | 1.13                    |
| <b>3f</b> | 496                                         | 587                          | 3126                             | 4.76                    | 651                          | 2.97                    |
| <b>3g</b> | 456                                         | 583                          | 4777                             | 3.73                    | 647                          | 1.33                    |
| <b>3h</b> | 498                                         | 590                          | 3131                             | 0.72                    | 662                          | 0.52                    |
| <b>3i</b> | 499                                         | 595                          | 3233                             | 3.63                    | 666                          | 1.01                    |
| <b>3j</b> | 499                                         | 594                          | 3205                             | 1.56                    | 648                          | 2.21                    |
| <b>3k</b> | 487                                         | 577                          | 3203                             | 4.64                    | 639                          | 3.03                    |
| <b>3l</b> | 499                                         | 597                          | 3290                             | 0.85                    | 663                          | 1.69                    |
| <b>3m</b> | 501                                         | 600                          | 3293                             | 0.67                    | 662                          | 2.09                    |
| <b>3n</b> | 507                                         | 619                          | 3569                             | 0.16                    | 669                          | 0.88                    |
| <b>3o</b> | 497                                         | 600                          | 3454                             | 0.87                    | 654                          | 1.65                    |
| <b>3p</b> | 463                                         | 577                          | 4267                             | < 0.10                  | 600                          | 7.28                    |
| <b>3q</b> | 466                                         | 566                          | 3791                             | 7.73                    | 650                          | 3.51                    |
| <b>5a</b> | 432                                         | 538                          | 4561                             | < 0.10                  | 596                          | 2.31                    |
| <b>5b</b> | 422                                         | 545                          | 5348                             | < 0.10                  | 579                          | < 0.10                  |
| <b>5c</b> | 375                                         | 560                          | 8810                             | < 0.10                  | 593                          | 0.63                    |
| <b>5d</b> | 425                                         | 554                          | 5479                             | < 0.10                  | 560                          | 1.76                    |
| <b>5e</b> | 422                                         | 547                          | 5415                             | < 0.10                  | 583                          | 0.45                    |

<sup>a</sup> Absorption maximum in CH<sub>2</sub>Cl<sub>2</sub> (~5×10<sup>-5</sup> M). <sup>b</sup> Emission maximum in CH<sub>2</sub>Cl<sub>2</sub> (~5×10<sup>-5</sup> M). <sup>c</sup> Absolute fluorescence quantum yields were measured in CH<sub>2</sub>Cl<sub>2</sub> at ~5×10<sup>-6</sup> M with an integrating sphere. <sup>d</sup> Emission maximum in the solid state. <sup>e</sup> Absolute fluorescence quantum were measured in the solid state.

## 2. Copies of Optical Spectra

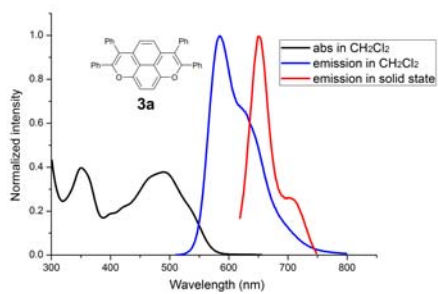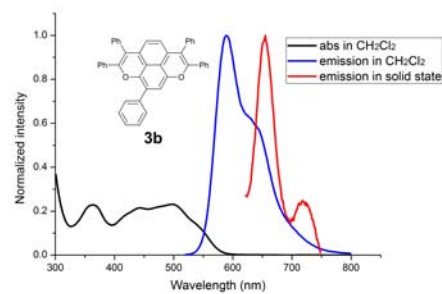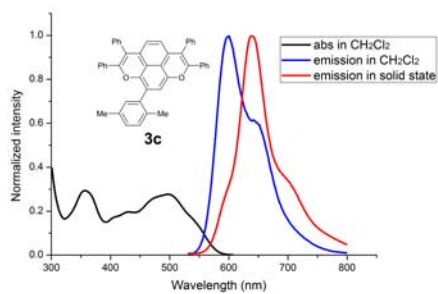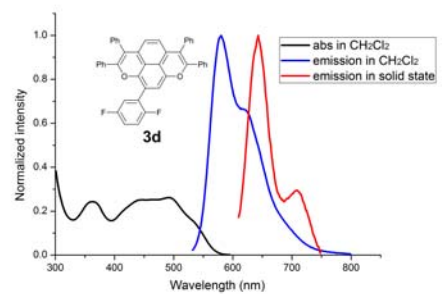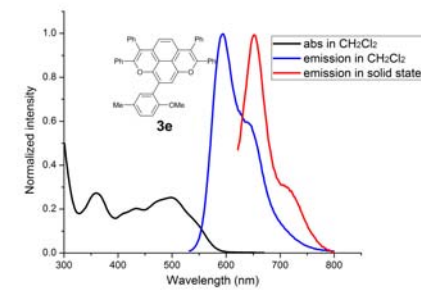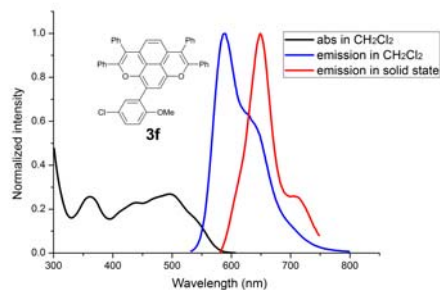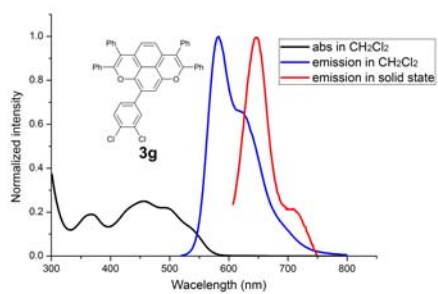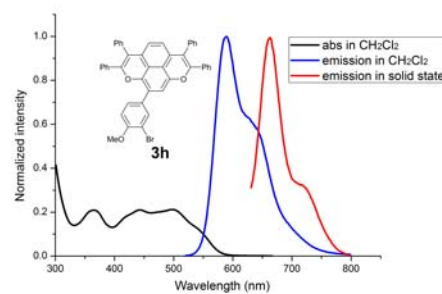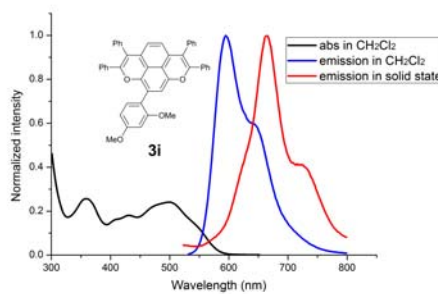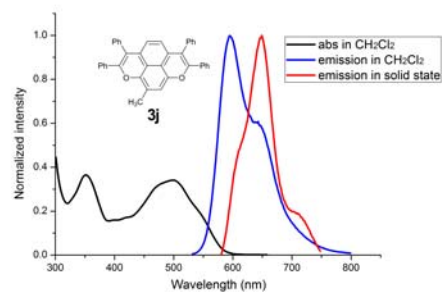



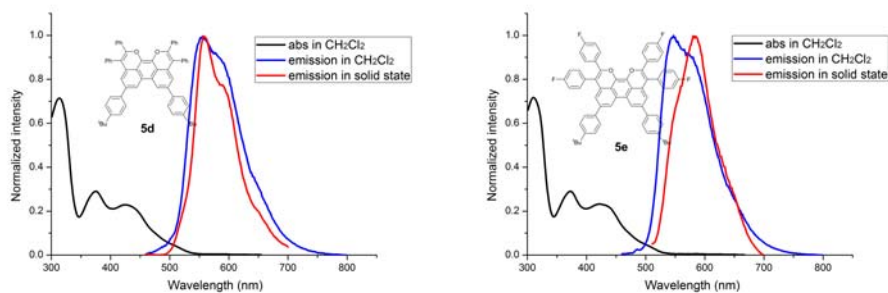

**Fig. S2.** Absorption and fluorescent spectra in  $\text{CH}_2\text{Cl}_2$  at  $\sim 5 \times 10^{-5}$  M and fluorescent spectra in solid state.

## VII. Cyclic voltammograms of **3d**, **3i** and **3q**

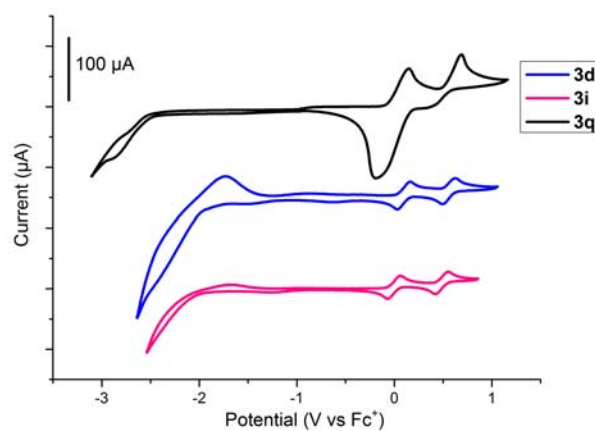

**Fig. S3.** Cyclic voltammograms of **3d**, **3i** and **3q** in dry  $\text{CH}_2\text{Cl}_2$ ; scan rate  $100 \text{ mV} \cdot \text{s}^{-1}$ ; supporting electrolyte: tetrabutylammonium hexafluorophosphate ( $\text{NBu}_4\text{PF}_6$ , 0.1 M). The reduction behavior of **3q** was measured in dry THF.

## VIII. TGA curves of **3d**, **3i** and **3q**

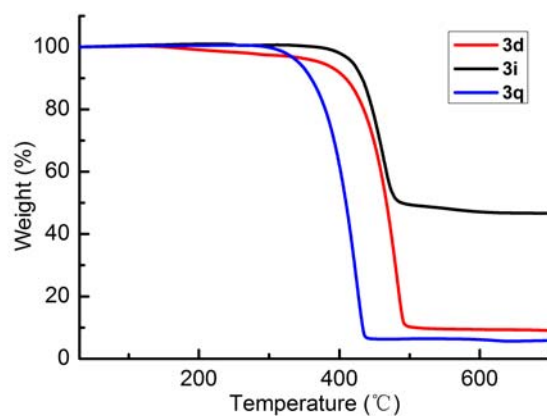

**Fig. S4.** TGA curves of **3d**, **3i** and **3q**.



## IX. Characterization data for the products

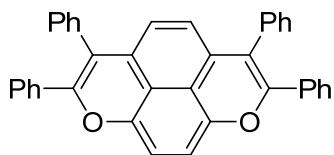

### 2,3,6,7-Tetraphenyl-1,8-dioxapyrene (3a):

Purification by column chromatography on silica gel (petroleum ether/dichloromethane = 5/1, v/v) afforded **3a** as a red solid (28 mg, 54% yield). M.p.: > 250 °C. <sup>1</sup>H NMR (400 MHz, CDCl<sub>3</sub>): δ = 5.81 (s, 2H), 6.48 (s, 2H), 7.11–7.30 (m, 20H) ppm. <sup>13</sup>C NMR (100 MHz, CDCl<sub>3</sub>): δ = 108.5, 117.2, 117.4, 124.8, 127.5, 127.7, 128.4, 128.7, 129.1, 129.9, 130.8, 134.2, 135.3, 147.1, 150.0 ppm. HRMS (ESI<sup>+</sup>): calcd for C<sub>38</sub>H<sub>24</sub>O<sub>2</sub> [M]<sup>+</sup> 512.1776, found 512.1781. Anal. Calcd for C<sub>38</sub>H<sub>24</sub>O<sub>2</sub> (%): C, 89.03; H, 4.72, found: C, 88.93; H, 4.84.

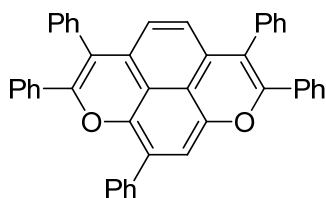

### 2,3,6,7,9-Pentaphenyl-1,8-dioxapyrene (3b):

Purification by column chromatography on silica gel (petroleum ether/dichloromethane = 5/1, v/v) afforded **3b** as a red solid (31 mg, 52% yield). M.p.: > 250 °C. <sup>1</sup>H NMR (400 MHz, CDCl<sub>3</sub>): δ = 5.85 (s, 2H), 6.65 (s, 1H), 7.03–7.32 (m, 21H), 7.40 (t, *J* = 7.2 Hz, 2H), 7.63 (d, *J* = 7.2 Hz, 2H) ppm. <sup>13</sup>C NMR (100 MHz, CDCl<sub>3</sub>): δ = 110.2, 117.3, 117.4, 117.6, 117.8, 122.1, 124.2, 125.1, 127.2, 127.55, 127.65, 127.7, 128.2, 128.3, 128.4, 128.5, 128.7, 129.1, 129.3, 129.9, 130.5, 130.80, 130.84, 133.9, 134.1, 135.3, 135.4, 137.0, 143.4, 147.2, 149.4, 150.0 ppm. HRMS (ESI<sup>+</sup>): calcd for C<sub>44</sub>H<sub>29</sub>O<sub>2</sub> [M+H]<sup>+</sup> 589.2168, found 589.2163. Anal. Calcd for C<sub>44</sub>H<sub>28</sub>O<sub>2</sub> (%): C, 89.76; H, 4.80, found: C, 89.32; H, 4.78.

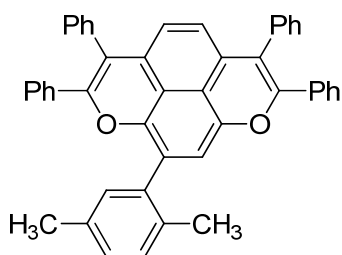

### 9-(2,5-Dimethylphenyl)-2,3,6,7-tetraphenyl-1,8-dioxapyrene (3c):

Purification by column chromatography on silica gel (petroleum ether/dichloromethane = 5/1, v/v) afforded **3c** as a red solid (40 mg, 65% yield). M.p.: > 250 °C. <sup>1</sup>H NMR (400 MHz, CDCl<sub>3</sub>): δ = 2.30 (s, 3H), 2.37 (s, 3H), 5.83 (s, 2H), 6.47 (s, 1H), 6.93-7.01 (m, 4H), 7.05-7.07 (m, 2H), 7.14-7.16 (m, 9H), 7.20-7.24 (m, 3H), 7.28-7.34 (m, 5H) ppm. <sup>13</sup>C NMR (100 MHz, CDCl<sub>3</sub>): δ = 19.8, 21.1, 111.0, 117.1, 117.36, 117.40, 117.7, 122.7, 124.1, 124.7, 127.49, 127.54, 127.6, 127.7, 128.17, 128.25, 128.3, 128.4, 128.7, 129.1, 129.3, 129.9, 130.5, 130.75, 130.84, 130.9, 133.5, 133.8, 134.2, 134.9, 135.3, 135.5, 136.6, 143.4, 146.7, 149.3, 150.0 ppm. HRMS (ESI<sup>+</sup>): calcd for C<sub>46</sub>H<sub>33</sub>O<sub>2</sub> [M+H]<sup>+</sup> 617.2481, found 617.2474. Anal. Calcd for C<sub>46</sub>H<sub>32</sub>O<sub>2</sub> (%): C, 89.58; H, 5.23, found: C, 88.76; H, 5.61.

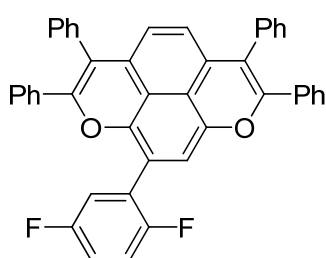

**9-(2,5-Difluorophenyl)-2,3,6,7-tetraphenyl-1,8-dioxapyrene (3d):**

Purification by column chromatography on silica gel (petroleum ether/dichloromethane = 6/1, v/v) afforded **3d** as a red solid (39 mg, 62% yield). M.p.: > 250 °C. <sup>1</sup>H NMR (400 MHz, CDCl<sub>3</sub>): δ = 5.90 (s, 2H), 6.53 (s, 1H), 6.99-7.22 (m, 18H), 7.28-7.31 (m, 5H) ppm. <sup>13</sup>C NMR (100 MHz, CDCl<sub>3</sub>): δ = 110.1, 115.1, 115.4, 115.5, 115.7, 115.8, 116.5, 116.6, 116.7, 116.8, 117.4, 117.5, 117.9, 118.1, 124.8, 124.9, 127.59, 127.62, 127.69, 127.73, 128.4, 128.49, 128.51, 128.7, 129.2, 129.3, 129.9, 130.3, 130.80, 130.83, 133.8, 134.1, 135.19, 135.22, 144.1, 147.0, 149.7, 150.0, 157.4 ppm. HRMS (ESI<sup>+</sup>): calcd for C<sub>44</sub>H<sub>27</sub>F<sub>2</sub>O<sub>2</sub> [M+H]<sup>+</sup> 625.1979, found 625.1979. Anal. Calcd for C<sub>44</sub>H<sub>26</sub>F<sub>2</sub>O<sub>2</sub> (%): C, 84.59; H, 4.20, found: C, 84.51; H, 4.00.

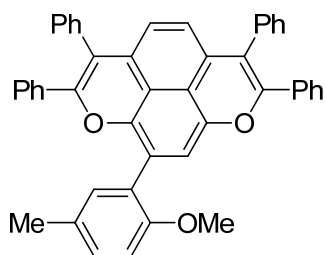

**9-(2-Methoxy-5-methylphenyl)-2,3,6,7-tetraphenyl-1,8-dioxapyrene (3e):**

Purification by column chromatography on silica gel (petroleum ether/dichloromethane = 4/1, v/v)

afforded **3e** as a red solid (36 mg, 57% yield). M.p.: > 250 °C. <sup>1</sup>H NMR (400 MHz, CDCl<sub>3</sub>): δ = 2.34 (s, 3H), 3.78 (s, 3H), 5.81 (s, 2H), 6.59 (s, 1H), 6.86 (d, *J* = 8.0 Hz, 1H), 6.98-7.16 (m, 13H), 7.20-7.25 (m, 4H), 7.27-7.34 (m, 5H) ppm. <sup>13</sup>C NMR (100 MHz, CDCl<sub>3</sub>): δ = 20.6, 55.8, 107.3, 111.0, 111.4, 117.1, 117.3, 117.4, 117.5, 119.3, 125.7, 127.4, 127.5, 127.6, 127.7, 128.1, 128.35, 128.39, 128.7, 129.1, 129.26, 129.28, 129.5, 130.8, 130.9, 132.2, 134.1, 134.3, 135.4, 135.6, 143.8, 146.5, 147.0, 149.4, 150.0, 155.0 ppm. HRMS (ESI<sup>+</sup>): calcd for C<sub>46</sub>H<sub>33</sub>O<sub>3</sub> [M+H]<sup>+</sup> 633.2430, found 633.2427. Anal. Calcd for C<sub>46</sub>H<sub>32</sub>O<sub>3</sub> (%): C, 87.31; H, 5.10, found: C, 86.89; H, 5.27.

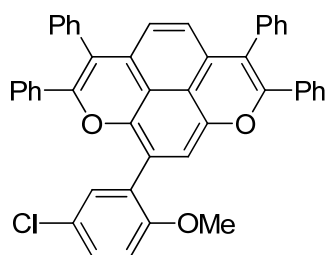

**9-(5-Chloro-2-methoxyphenyl)-2,3,6,7-tetraphenyl-1,8-dioxapyrene (3f):**

Purification by column chromatography on silica gel (petroleum ether/dichloromethane = 4/1, v/v) afforded **3f** as a red solid (47 mg, 71% yield). M.p.: > 250 °C. <sup>1</sup>H NMR (400 MHz, CDCl<sub>3</sub>): δ = 3.77 (s, 3H), 5.85 (s, 2H), 6.55 (s, 1H), 6.88 (d, *J* = 8.8 Hz, 1H), 7.02-7.04 (m, 4H), 7.13-7.16 (m, 8H), 7.20-7.24 (m, 3H), 7.28-7.34 (m, 6H), 7.41 (d, *J* = 2.4 Hz, 1H) ppm. <sup>13</sup>C NMR (100 MHz, CDCl<sub>3</sub>): δ = 56.0, 110.9, 112.3, 117.35, 117.40, 117.5, 117.7, 117.8, 124.5, 124.7, 125.3, 127.5, 127.6, 127.7, 128.2, 128.36, 128.42, 128.5, 128.7, 129.1, 129.3, 129.9, 130.4, 130.78, 130.84, 131.4, 133.9, 134.2, 135.3, 135.4, 143.9, 146.6, 149.4, 150.0, 155.7 ppm. HRMS (ESI<sup>+</sup>): calcd for C<sub>45</sub>H<sub>30</sub>ClO<sub>3</sub> [M+H]<sup>+</sup> 653.1883, found 653.1875. Anal. Calcd for C<sub>45</sub>H<sub>29</sub>ClO<sub>3</sub> (%): C, 82.80; H, 4.48, found: C, 82.36; H, 4.26.

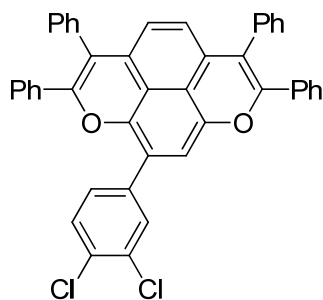

**9-(3,4-Dichlorophenyl)-2,3,6,7-tetraphenyl-1,8-dioxapyrene (3g):**

Purification by column chromatography on silica gel (petroleum ether/dichloromethane = 6/1, v/v)

afforded **3g** as a red solid (40 mg, 61% yield). M.p.: > 250 °C. <sup>1</sup>H NMR (400 MHz, CDCl<sub>3</sub>): δ = 5.90 (s, 2H), 6.58 (s, 1H), 7.08-7.25 (m, 15H), 7.28- 7.34 (m, 5H), 7.43 (s, 2H), 7.81 (s, 1H) ppm. <sup>13</sup>C NMR (100 MHz, CDCl<sub>3</sub>): δ = 109.2, 117.3, 117.7, 117.9, 118.3, 119.2, 124.6, 125.0, 127.6, 127.7, 127.8, 128.3, 128.4, 128.5, 128.7, 129.2, 129.3, 129.9, 130.2, 130.3, 130.7, 130.8, 131.0, 132.2, 133.6, 133.9, 135.06, 135.07, 137.0, 143.6, 147.4, 149.2, 150.0 ppm. HRMS (ESI<sup>+</sup>): calcd for C<sub>44</sub>H<sub>27</sub>Cl<sub>2</sub>O<sub>2</sub> [M+H]<sup>+</sup> 657.1388, found 657.1384. Anal. Calcd for C<sub>44</sub>H<sub>26</sub>Cl<sub>2</sub>O<sub>2</sub> (%): C, 80.47; H, 3.99, found: C, 80.40; H, 3.76.

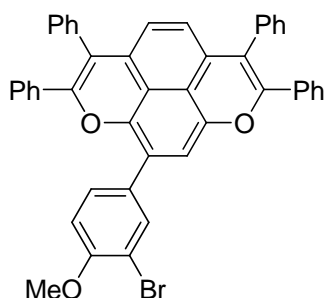

**9-(3-Bromo-4-methoxyphenyl)-2,3,6,7-tetraphenyl-1,8-dioxapyrene (3h):**

Purification by column chromatography on silica gel (petroleum ether/dichloromethane = 6/1, v/v) afforded **3h** as a red solid (48 mg, 69% yield). M.p.: > 250 °C. <sup>1</sup>H NMR (400 MHz, CDCl<sub>3</sub>): δ = 3.93 (s, 3H), 5.86 (s, 2H), 6.60 (s, 1H), 6.91 (d, *J* = 8.8 Hz, 1H), 7.08-7.34 (m, 20H), 7.49 (d, *J* = 8.4 Hz, 1H), 7.95 (s, 1H) ppm. <sup>13</sup>C NMR (100 MHz, CDCl<sub>3</sub>): δ = 56.4, 100.1, 109.5, 111.3, 111.7, 117.3, 117.5, 117.6, 118.0, 120.2, 124.2, 125.1, 127.6, 127.7, 128.4, 128.47, 128.52, 128.7, 129.0, 129.1, 129.3, 129.9, 130.4, 130.79, 130.83, 133.8, 134.0, 134.1, 135.2, 135.3, 143.4, 147.3, 149.3, 150.0, 155.0 ppm. HRMS (ESI<sup>+</sup>): calcd for C<sub>45</sub>H<sub>30</sub>BrO<sub>3</sub> [M+H]<sup>+</sup> 697.1378, found 697.1377. Anal. Calcd for C<sub>45</sub>H<sub>29</sub>BrO<sub>3</sub> (%): C, 77.57; H, 4.20, found: C, 77.63; H, 4.27.

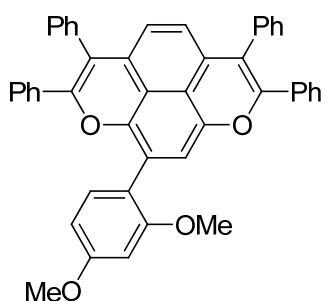

**9-(2,4-Dimethoxyphenyl)-2,3,6,7-tetraphenyl-1,8-dioxapyrene (3i):**

Purification by column chromatography on silica gel (petroleum ether/dichloromethane = 2/1, v/v)

afforded **3i** as a red solid (31 mg, 47% yield). M.p.: > 250 °C. <sup>1</sup>H NMR (400 MHz, CDCl<sub>3</sub>): δ = 3.78 (s, 3H), 3.85 (s, 3H), 5.80 (s, 2H), 6.54-6.56 (m, 3H), 7.01-7.02 (m, 4H), 7.06-7.15 (m, 8H), 7.20-7.33 (m, 9H) ppm. <sup>13</sup>C NMR (100 MHz, CDCl<sub>3</sub>): δ = 55.5, 55.7, 98.7, 104.2, 111.6, 117.0, 117.3, 117.36, 117.42, 118.8, 119.0, 120.9, 124.1, 124.8, 127.4, 127.5, 127.6, 127.7, 128.1, 128.4, 128.7, 129.1, 129.3, 130.81, 130.85, 131.9, 134.1, 134.3, 135.4, 135.6, 143.9, 146.5, 149.4, 149.9, 158.0, 160.5 ppm. HRMS (ESI<sup>+</sup>): calcd for C<sub>46</sub>H<sub>32</sub>O<sub>4</sub> [M]<sup>+</sup> 648.2301, found 648.2295. Anal. Calcd for C<sub>46</sub>H<sub>32</sub>O<sub>4</sub> (%): C, 85.15; H, 4.98, found: C, 84.24; H, 5.42.

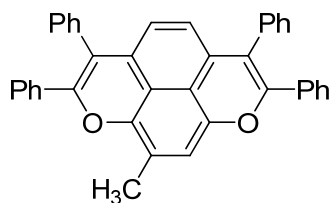

### 9-Methyl-2,3,6,7-tetraphenyl-1,8-dioxapyrene (**3j**):

Purification by column chromatography on silica gel (petroleum ether/dichloromethane = 6/1, v/v) afforded **3j** as a red solid (22 mg, 42% yield). M.p.: > 250 °C. <sup>1</sup>H NMR (400 MHz, CDCl<sub>3</sub>): δ = 2.16 (s, 3H), 5.75 (s, 2H), 6.42 (s, 1H), 7.11-7.24 (m, 16H), 7.28-7.31 (m, 4H) ppm. <sup>13</sup>C NMR (100 MHz, CDCl<sub>3</sub>): δ = 15.2, 111.1, 116.2, 117.2, 117.41, 117.45, 118.3, 123.1, 124.6, 127.4, 127.5, 127.7, 128.31, 128.34, 128.5, 128.7, 129.0, 129.2, 129.8, 129.9, 130.8, 134.3, 134.5, 135.4, 135.5, 137.9, 144.2, 146.5, 149.6, 149.9 ppm. HRMS (ESI<sup>+</sup>): calcd for C<sub>39</sub>H<sub>26</sub>O<sub>2</sub> [M]<sup>+</sup> 526.1933, found 526.1943. Anal. Calcd for C<sub>39</sub>H<sub>26</sub>O<sub>2</sub> (%): C, 88.94; H, 4.98, found: C, 88.40; H, 5.05.

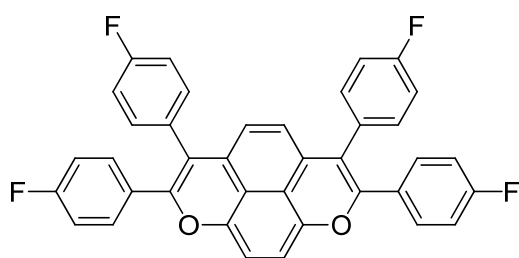

### 2,3,6,7-Tetra(4-fluorophenyl)-1,8-dioxapyrene (**3k**):

Purification by column chromatography on silica gel (petroleum ether/dichloromethane = 6/1, v/v) afforded **3k** as a red solid (26 mg, 45% yield). M.p.: > 250 °C. <sup>1</sup>H NMR (400 MHz, CDCl<sub>3</sub>): δ = 5.78 (s, 2H), 6.47 (s, 2H), 6.82-6.86 (m, 4H), 6.98-7.02 (m, 4H), 7.06-7.09 (m, 4H), 7.14-7.18 (m, 4H) ppm. <sup>13</sup>C NMR (100 MHz, CDCl<sub>3</sub>): δ = 108.8, 114.8, 115.0, 116.3, 116.5, 117.1, 124.7, 129.8, 130.0, 130.1, 130.6, 130.7, 130.90, 130.94, 132.5, 132.6, 147.0, 149.6, 161.0, 161.3, 163.5, 163.8

ppm. HRMS (ESI<sup>+</sup>): calcd for C<sub>38</sub>H<sub>21</sub>F<sub>4</sub>O<sub>2</sub> [M+H]<sup>+</sup> 585.1478, found 585.1469.

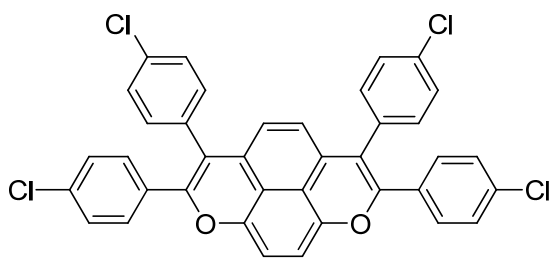

**2,3,6,7-Tetra(4-chlorophenyl)-1,8-dioxapyrene (3l):**

Purification by column chromatography on silica gel (petroleum ether/dichloromethane = 6/1, v/v) afforded **3l** as a red solid (36 mg, 55% yield). M.p.: > 250 °C. <sup>1</sup>H NMR (400 MHz, CDCl<sub>3</sub>): δ = 5.77 (s, 2H), 6.46 (s, 2H), 7.04 (d, *J* = 8.4 Hz, 4H), 7.08-7.14 (m, 8H), 7.28 (d, *J* = 8.0 Hz, 4H) ppm. <sup>13</sup>C NMR (100 MHz, CDCl<sub>3</sub>): δ = 108.9, 116.6, 117.2, 124.7, 128.2, 129.66, 129.69, 130.0, 132.16, 132.22, 133.4, 133.8, 134.6, 147.0, 149.4 ppm. HRMS (ESI<sup>+</sup>): calcd for C<sub>38</sub>H<sub>21</sub>Cl<sub>4</sub>O<sub>2</sub> [M+H]<sup>+</sup> 649.0296, found 649.0301. Anal. Calcd for C<sub>38</sub>H<sub>20</sub>Cl<sub>4</sub>O<sub>2</sub> (%): C, 70.37; H, 3.11, found: C, 70.16; H, 3.18.

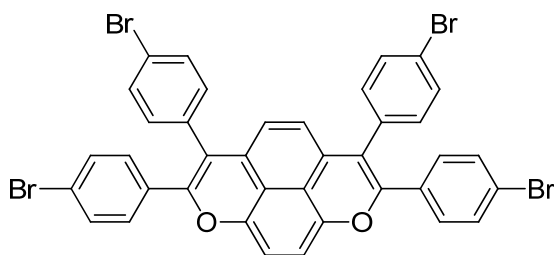

**2,3,6,7-Tetra(4-bromophenyl)-1,8-dioxapyrene (3m):**

Purification by column chromatography on silica gel (petroleum ether/dichloromethane = 7/1, v/v) afforded **3m** as a red solid (42 mg, 51% yield). M.p.: > 250 °C. <sup>1</sup>H NMR (400 MHz, CDCl<sub>3</sub>): δ = 5.76 (s, 2H), 6.46 (s, 2H), 6.98 (d, *J* = 8.4 Hz, 4H), 7.03 (d, *J* = 8.8 Hz, 4H), 7.29 (d, *J* = 8.4 Hz, 4H), 7.44 (d, *J* = 8.0 Hz, 4H) ppm. <sup>13</sup>C NMR (100 MHz, CDCl<sub>3</sub>): δ = 108.9, 116.7, 117.2, 121.9, 122.9, 124.7, 129.6, 130.2, 131.2, 132.5, 132.7, 133.8, 147.0, 149.4 ppm. HRMS (ESI<sup>+</sup>): calcd for C<sub>38</sub>H<sub>21</sub>Br<sub>4</sub>O<sub>2</sub> [M+H]<sup>+</sup> 824.8275, found 824.8272. Anal. Calcd for C<sub>38</sub>H<sub>20</sub>Br<sub>4</sub>O<sub>2</sub> (%): C, 55.35; H, 2.45, found: C, 55.21; H, 2.26.

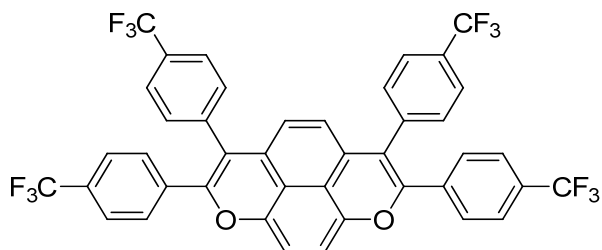

**2,3,6,7-Tetra(4-(trifluoromethyl)phenyl)-1,8-dioxapyrene (3n):**

Purification by column chromatography on silica gel (petroleum ether/dichloromethane = 8/1, v/v) afforded **3n** as a red solid (41 mg, 52% yield). M.p.: > 250 °C. <sup>1</sup>H NMR (400 MHz, CDCl<sub>3</sub>): δ = 5.74 (s, 2H), 6.52 (s, 2H), 7.24-7.29 (m, 8H), 7.42 (d, *J* = 8.4 Hz, 4H), 7.58 (d, *J* = 8.0 Hz, 4H) ppm. <sup>13</sup>C NMR (100 MHz, CDCl<sub>3</sub>): δ = 109.2, 117.6, 122.5, 122.7, 124.8, 124.97, 125.01, 125.2, 125.4, 126.4, 126.5, 128.9, 129.6, 130.2, 130.5, 130.6, 130.9, 131.2, 136.9, 138.5, 147.0, 149.4 ppm. HRMS (ESI<sup>+</sup>): calcd for C<sub>42</sub>H<sub>21</sub>F<sub>12</sub>O<sub>2</sub> [M+H]<sup>+</sup> 785.1350, found 785.1349. Anal. Calcd for C<sub>42</sub>H<sub>20</sub>F<sub>12</sub>O<sub>2</sub> (%): C, 64.28; H, 2.57, found: C, 64.04; H, 3.01.

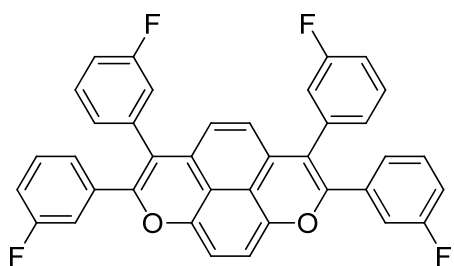

**2,3,6,7-Tetra(3-fluorophenyl)-1,8-dioxapyrene (3o):**

Purification by column chromatography on silica gel (petroleum ether/dichloromethane = 6/1, v/v) afforded **3o** as a red solid (25 mg, 43% yield). M.p.: > 250 °C. <sup>1</sup>H NMR (400 MHz, CDCl<sub>3</sub>): δ = 5.80 (s, 2H), 6.49 (s, 2H), 6.84-7.00 (m, 12H), 7.07-7.13 (m, 2H), 7.28-7.32 (m, 2H) ppm. <sup>13</sup>C NMR (100 MHz, CDCl<sub>3</sub>): δ = 108.9, 114.9, 115.1, 115.4, 115.7, 115.9, 117.0, 117.1, 117.4, 117.5, 117.7, 124.41, 124.44, 124.8, 126.47, 126.50, 129.3, 129.4, 129.6, 130.9, 131.0, 135.7, 135.8, 137.0, 137.1, 147.0, 149.1, 149.2, 161.1, 162.3, 163.5, 164.7 ppm. HRMS (ESI<sup>+</sup>): calcd for C<sub>38</sub>H<sub>21</sub>F<sub>4</sub>O<sub>2</sub> [M+H]<sup>+</sup> 585.1478, found 585.1477. Anal. Calcd for C<sub>38</sub>H<sub>20</sub>F<sub>4</sub>O<sub>2</sub> (%): C, 78.06; H, 3.45, found: C, 77.19; H, 3.21.

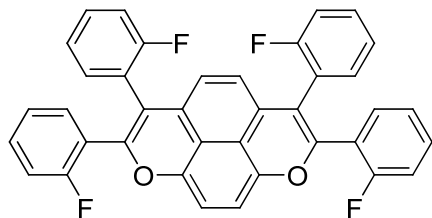

**2,3,6,7-Tetra(2-fluorophenyl)-1,8-dioxapyrene (3p):**

Purification by column chromatography on silica gel (petroleum ether/dichloromethane = 5/1, v/v) afforded **3p** as an orange-red solid (24 mg, 41% yield). M.p.: > 250 °C. <sup>1</sup>H NMR (400 MHz, CDCl<sub>3</sub>): δ = 5.74 (s, 2H), 6.43 (s, 2H), 6.89-7.00 (m, 8H), 7.05-7.08 (m, 2H), 7.14-7.28 (m, 6H) ppm. <sup>13</sup>C NMR (100 MHz, CDCl<sub>3</sub>): δ = 108.9, 114.16, 114.22, 115.57, 115.64, 115.7, 115.8, 115.86, 115.92, 116.8, 122.0, 122.1, 122.3, 123.78, 123.82, 124.3, 124.35, 124.38, 125.0, 128.7, 129.77, 129.85, 131.0, 131.1, 132.43, 147.4, 147.6, 158.7, 159.6, 161.2, 162.0 ppm. HRMS (ESI<sup>+</sup>): calcd for C<sub>38</sub>H<sub>21</sub>F<sub>4</sub>O<sub>2</sub> [M+H]<sup>+</sup> 585.1478, found 585.1470. Anal. Calcd for C<sub>38</sub>H<sub>20</sub>F<sub>4</sub>O<sub>2</sub> (%): C, 78.06; H, 3.45, found: C, 77.75; H, 3.26.

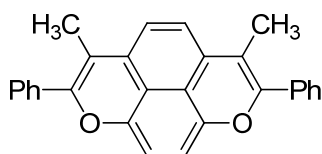

**3,6-Dimethyl-2,7-diphenyl-1,8-dioxapyrene (3q):**

Purification by column chromatography on silica gel (petroleum ether/dichloromethane = 7/1, v/v) afforded **3q** as a red solid (18 mg, 46% yield). M.p.: 204-205 °C. <sup>1</sup>H NMR (400 MHz, CDCl<sub>3</sub>): δ = 1.80 (s, 6H), 6.38 (s, 2H), 6.42 (s, 2H), 7.36-7.44 (m, 6H), 7.50-7.52 (m, 4H) ppm. <sup>13</sup>C NMR (100 MHz, CDCl<sub>3</sub>): δ = 13.3, 108.3, 109.0, 115.0, 124.3, 128.3, 128.9, 129.1, 129.4, 134.8, 146.9, 150.1 ppm. HRMS (ESI<sup>+</sup>): calcd for C<sub>28</sub>H<sub>20</sub>O<sub>2</sub> [M]<sup>+</sup> 388.1463, found 388.1456. Anal. Calcd for C<sub>28</sub>H<sub>20</sub>O<sub>2</sub> (%): C, 86.57; H, 5.19, found: C, 86.47; H, 5.16.

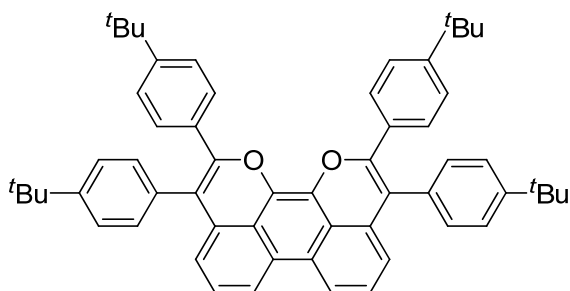

**2,3,10,11-Tetra(4-tert-butylphenyl)-1,12-dioxapyrene (5a):**



Purification by column chromatography on silica gel (petroleum ether/dichloromethane = 6/1, v/v) afforded **5a** as an orange solid (47 mg, 59% yield). M.p.: > 250 °C. <sup>1</sup>H NMR (400 MHz, CDCl<sub>3</sub>): δ = 1.29 (s, 18H), 1.40 (s, 18H), 6.65 (d, *J* = 7.2 Hz, 2H), 7.17-7.21 (m, 6H), 7.25-7.27 (m, 4H), 7.35 (d, *J* = 8.8 Hz, 4H), 7.46 (d, *J* = 8.0 Hz, 4H), 7.96 (d, *J* = 8.4 Hz, 2H) ppm. <sup>13</sup>C NMR (100 MHz, CDCl<sub>3</sub>): δ = 31.3, 31.6, 34.7, 34.8, 115.9, 118.7, 120.2, 123.2, 124.5, 124.7, 125.5, 126.2, 128.5, 130.9, 131.6, 132.0, 132.4, 133.1, 148.1, 150.7, 151.2 ppm. HRMS (ESI<sup>+</sup>): calcd for C<sub>58</sub>H<sub>59</sub>O<sub>2</sub> [M+H]<sup>+</sup> 787.4515, found 787.4514. Anal. Calcd for C<sub>58</sub>H<sub>58</sub>O<sub>2</sub> (%): C, 88.50; H, 7.43, found: C, 88.00; H, 7.45.

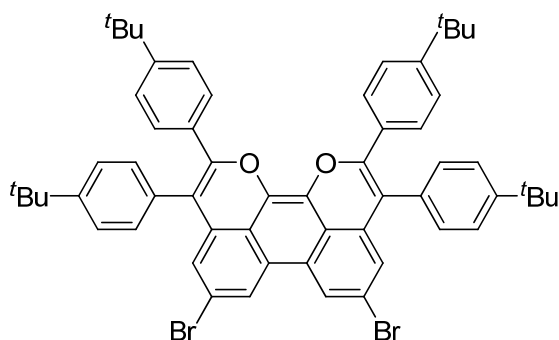

**5,8-Bibromo-2,3,10,11-tetra(4-*tert*-butylphenyl)-1,12-dioxaperylene (5b):**

Purification by column chromatography on silica gel (petroleum ether/dichloromethane = 8/1, v/v) afforded **5b** as an orange solid (48 mg, 50% yield). M.p.: > 250 °C. <sup>1</sup>H NMR (400 MHz, CDCl<sub>3</sub>): δ = 1.27 (s, 18H), 1.39 (s, 18H), 6.73 (s, 2H), 7.16-7.22 (m, 8H), 7.26-7.29 (m, 4H), 7.45 (d, *J* = 7.6 Hz, 4H), 8.01 (s, 2H) ppm. <sup>13</sup>C NMR (100 MHz, CDCl<sub>3</sub>): δ = 31.3, 31.6, 34.7, 34.8, 115.1, 120.7, 121.6, 122.1, 122.4, 124.6, 124.8, 126.5, 128.6, 130.6, 131.0, 132.1, 132.6, 134.2, 149.5, 151.1, 151.8 ppm. HRMS (ESI<sup>+</sup>): calcd for C<sub>58</sub>H<sub>57</sub>Br<sub>2</sub>O<sub>2</sub> [M+H]<sup>+</sup> 943.2725, found 943.2719. Anal. Calcd for C<sub>58</sub>H<sub>57</sub>Br<sub>2</sub>O<sub>2</sub> (%): C, 73.86; H, 5.99, found: C, 73.56; H, 6.00.

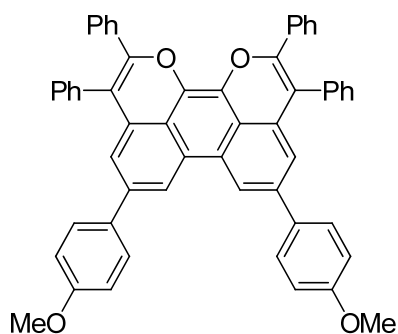

**5,8-Bi(4-methoxyphenyl)-2,3,10,11-tetraphenyl-1,12-dioxaperylene (5c):**

Purification by column chromatography on silica gel (petroleum ether/dichloromethane = 1/1, v/v) afforded **5c** as an orange solid (55 mg, 71% yield). M.p.: > 250 °C. <sup>1</sup>H NMR (400 MHz, CDCl<sub>3</sub>): δ = 3.84 (s, 6H), 6.89 (s, 2H), 6.96 (d, *J* = 6.4 Hz, 4H), 7.20-7.26 (m, 6H), 7.37-7.48 (m, 18H), 8.25 (s, 2H) ppm. <sup>13</sup>C NMR (100 MHz, CDCl<sub>3</sub>): δ = 55.5, 114.4, 116.6, 118.2, 118.4, 122.4, 125.3, 127.75, 127.85, 128.4, 128.5, 128.9, 129.4, 131.4, 132.2, 132.4, 134.2, 134.4, 135.9, 138.2, 148.9, 159.3 ppm. HRMS (ESI<sup>+</sup>): calcd for C<sub>56</sub>H<sub>39</sub>O<sub>4</sub> [M+H]<sup>+</sup> 775.2848, found 775.2845.

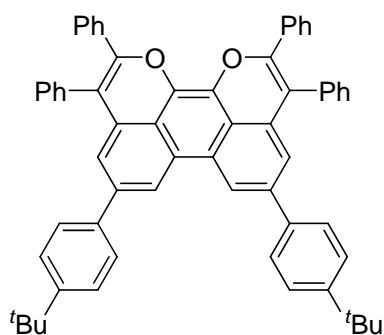

**5,8-Bi(4-tert-butylphenyl)-2,3,10,11-tetraphenyl-1,12-dioxaperylene (5d):**

Purification by column chromatography on silica gel (petroleum ether/dichloromethane = 3/1, v/v) afforded **5d** as a yellow solid (51 mg, 61% yield). M.p.: > 250 °C. <sup>1</sup>H NMR (400 MHz, CDCl<sub>3</sub>): δ = 1.35 (s, 18H), 6.93 (s, 2H), 7.18-7.22 (m, 6H), 7.36-7.51 (m, 22H), 8.30 (s, 2H) ppm. <sup>13</sup>C NMR (100 MHz, CDCl<sub>3</sub>): δ = 31.5, 34.7, 116.6, 118.4, 118.9, 125.3, 125.9, 127.1, 127.76, 127.85, 128.5, 128.9, 129.4, 131.4, 132.2, 132.5, 134.4, 135.9, 138.6, 138.9, 140.7, 148.9, 150.5 ppm. HRMS (ESI<sup>+</sup>): calcd for C<sub>62</sub>H<sub>51</sub>O<sub>2</sub> [M+H]<sup>+</sup> 827.3889, found 827.3885.

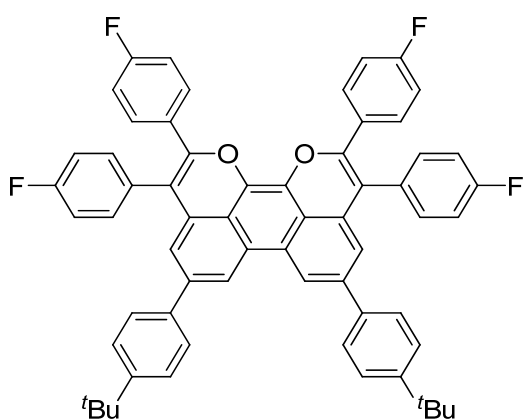

**5,8-Bi(4-tert-butylphenyl)-2,3,10,11-tetra(4-fluorophenyl)-1,12-dioxaperylene (5e):**

Purification by column chromatography on silica gel (petroleum ether/dichloromethane = 4/1, v/v) afforded **5e** as an orange-yellow solid (47 mg, 52% yield). M.p.: > 250 °C. <sup>1</sup>H NMR (400 MHz, CDCl<sub>3</sub>): δ = 1.36 (s, 18H), 6.88-6.92 (m, 6H), 7.11-7.15 (m, 4H), 7.28-7.36 (m, 8H), 7.45-7.51 (m,

8H), 8.30 (s, 2H) ppm.  $^{13}\text{C}$  NMR (100 MHz,  $\text{CDCl}_3$ ):  $\delta$  = 31.5, 34.7, 114.9, 115.1, 115.6, 116.6, 116.8, 118.4, 119.1, 122.4, 125.4, 126.0, 127.0, 130.2, 130.3, 130.76, 130.84, 131.48, 131.52, 131.8, 132.3, 133.0, 133.1, 138.6, 138.7, 148.4, 150.7, 161.2, 161.4, 163.7, 163.9 ppm. HRMS ( $\text{ESI}^+$ ): calcd for  $\text{C}_{62}\text{H}_{47}\text{F}_4\text{O}_2$   $[\text{M}+\text{H}]^+$  899.3512, found 899.3510. Anal. Calcd for  $\text{C}_{62}\text{H}_{46}\text{F}_4\text{O}_2$  (%): C, 82.82; H, 5.16, found: C, 81.85; H, 5.01.

## X. References

- 1 J. W. Kang, K. Moseley and P. M. Maitlis, *J. Am. Chem. Soc.*, 1969, **91**, 5970.
- 2 M. J. Mio, L. C. Kopel, J. B. Braun, T. L. Gadzikwa, K. L. Hull, R. G. Brisbois, C. J. Markworth and P. A. Grieco, *Org. Lett.*, 2002, **4**, 3199.
- 3 B. N. Boden, K. J. Jardine, A. C. W. Leung and M. J. MacLachlan, *Org. Lett.*, 2006, **8**, 1855.
- 4 S. Zhang, F. Song, D. Zhao and J. You, *Chem. Commun.*, 2013, **49**, 4558.
- 5 H. Li, F. Zhou, T. L. D. Tam, Y. M. Lam, S. G. Mhaisalkar, H. Su and A. C. Grimsdale, *J. Mater. Chem. C.*, 2013, **1**, 1745.
- 6 Z. She, Y. Shi, Y. Huang, Y. Cheng, F. Song and J. You, *Chem. Commun.*, 2014, **50**, 13914.

# XI. Copies of $^1\text{H}$ and $^{13}\text{C}$ NMR Spectra

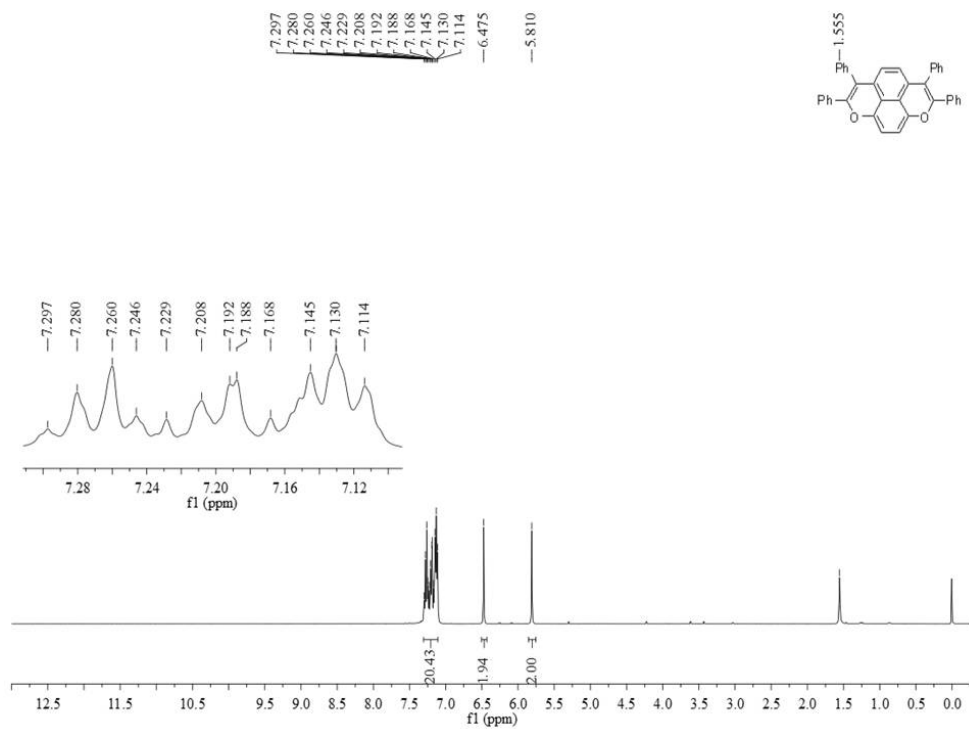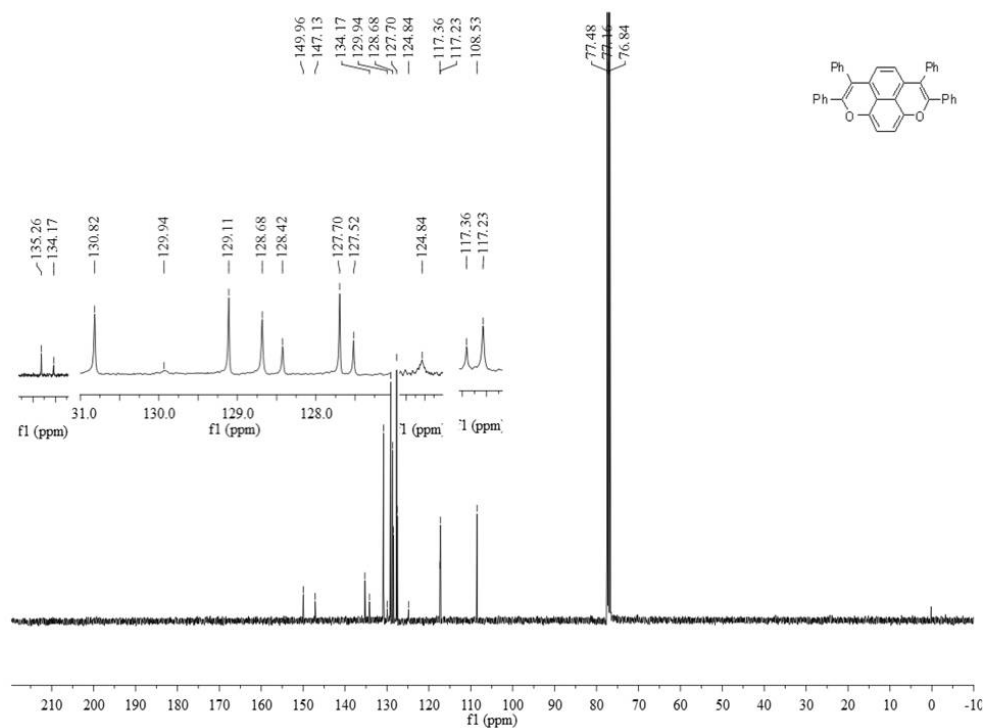

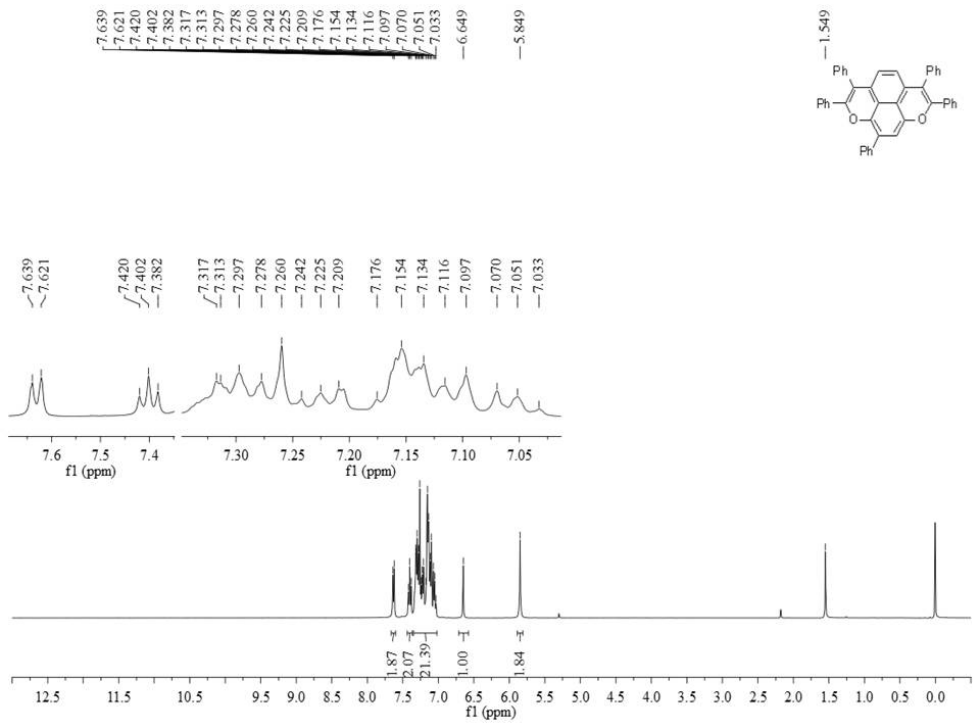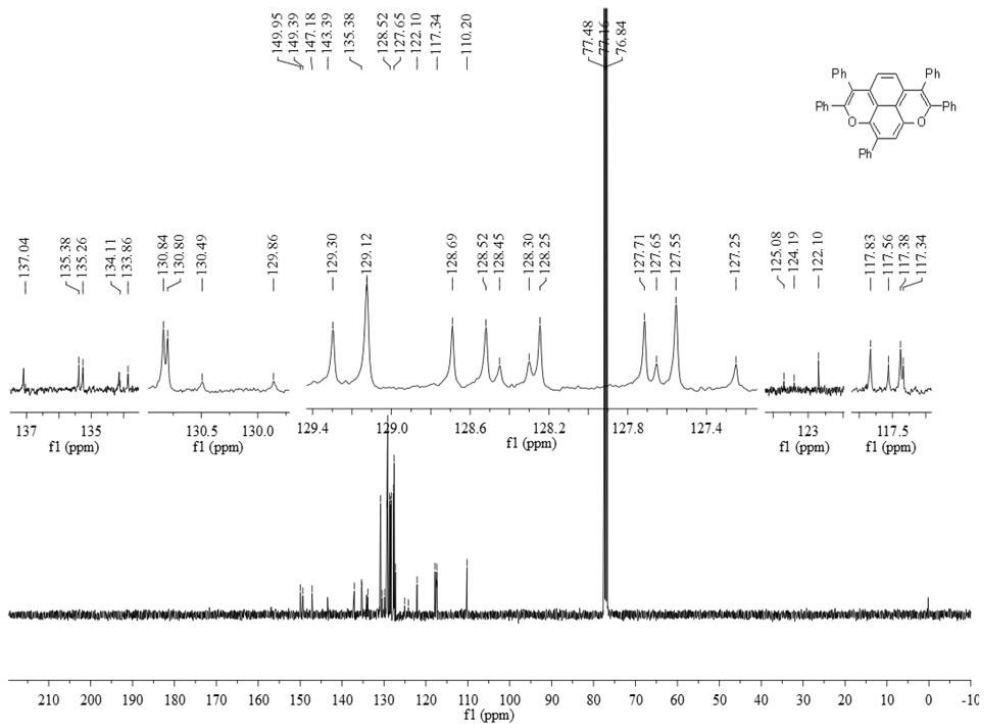

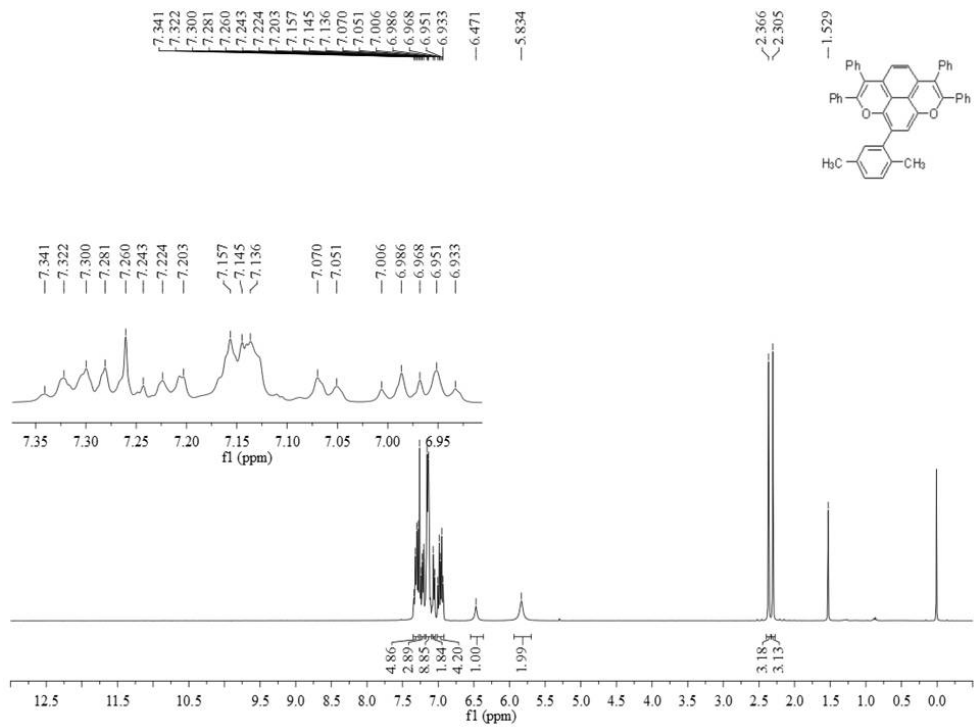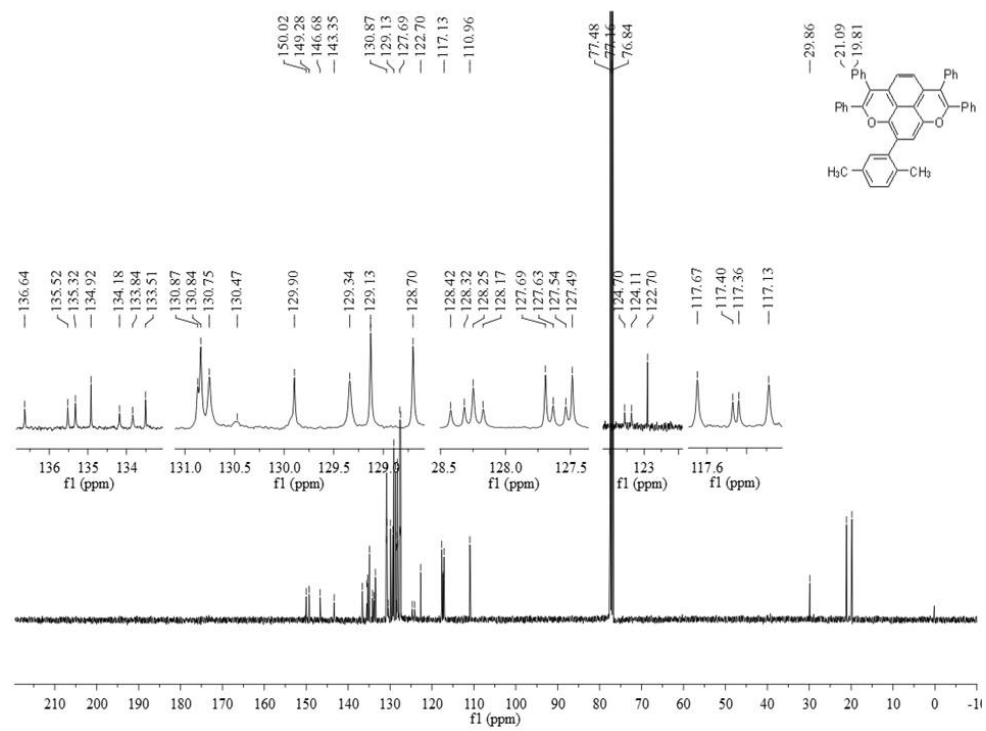

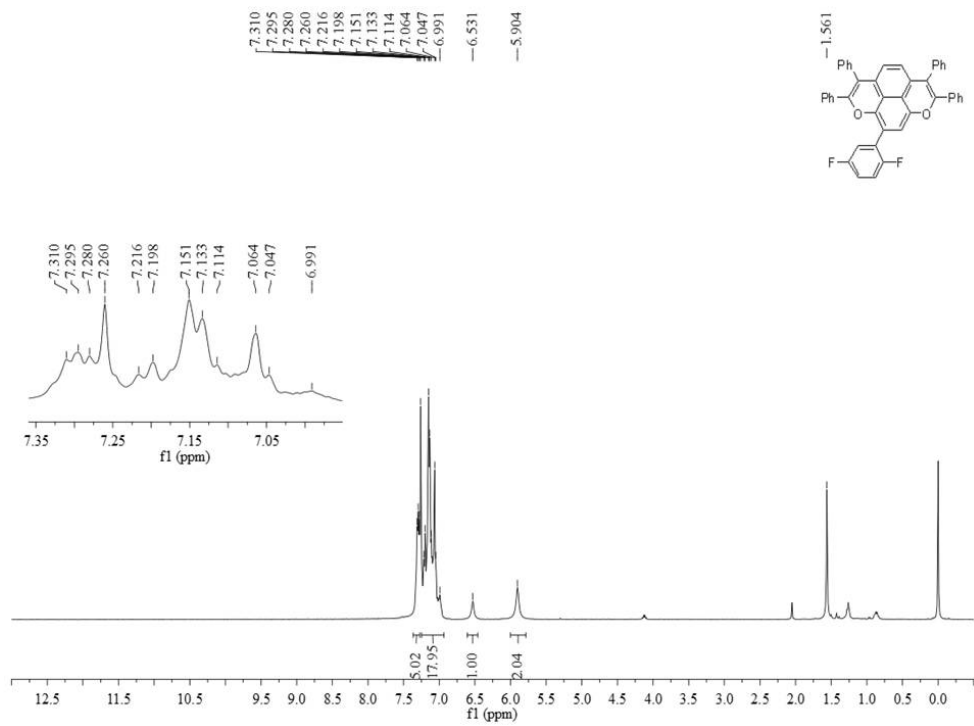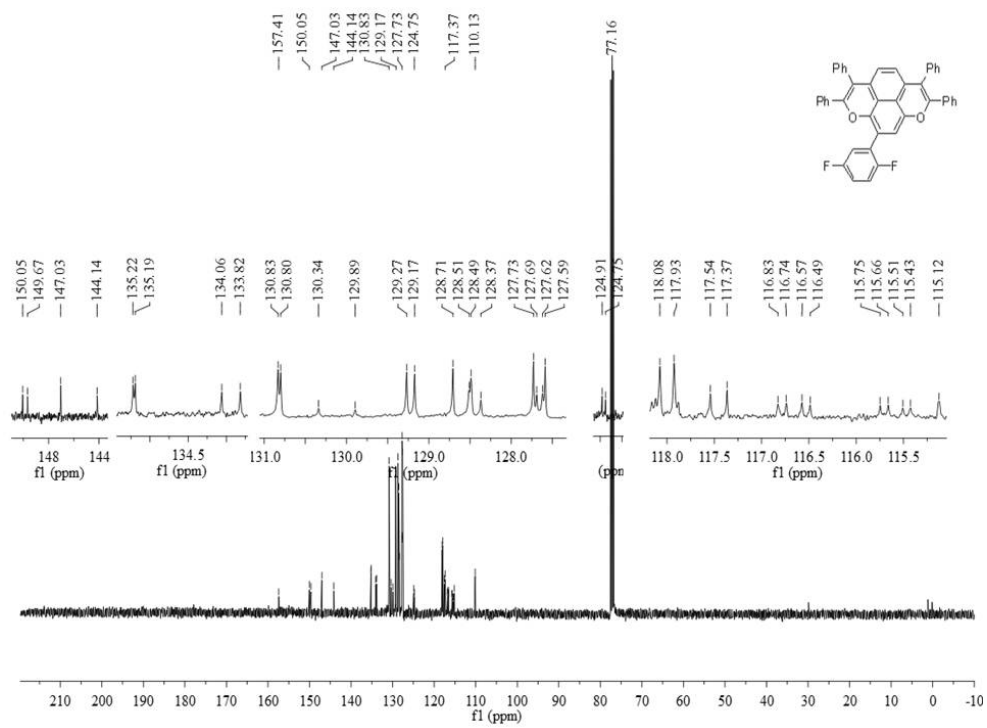

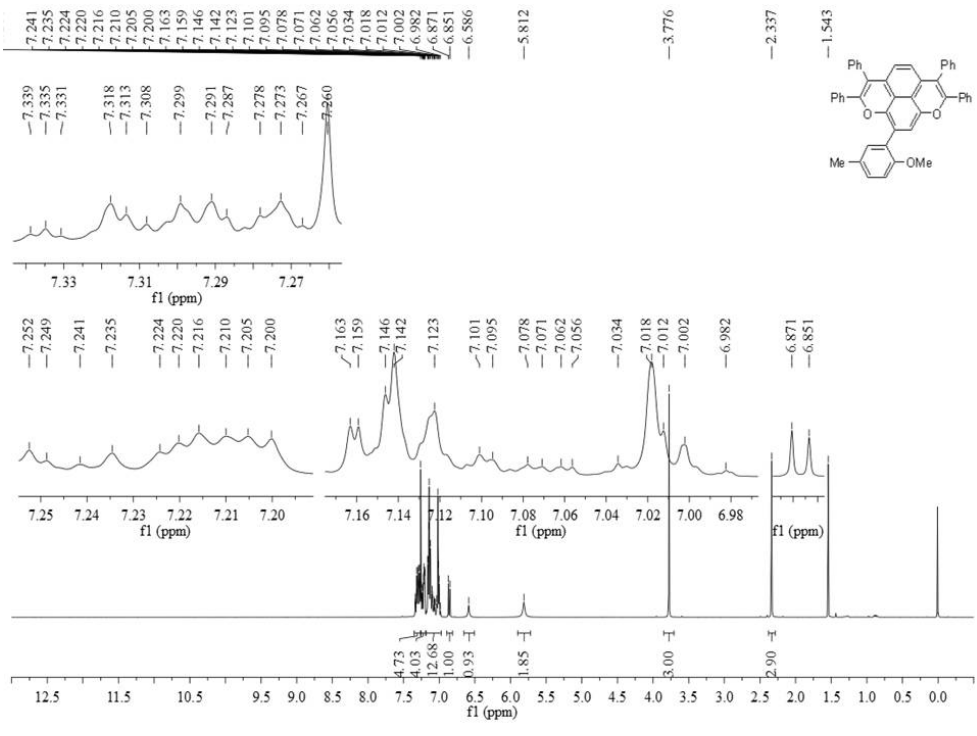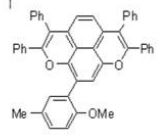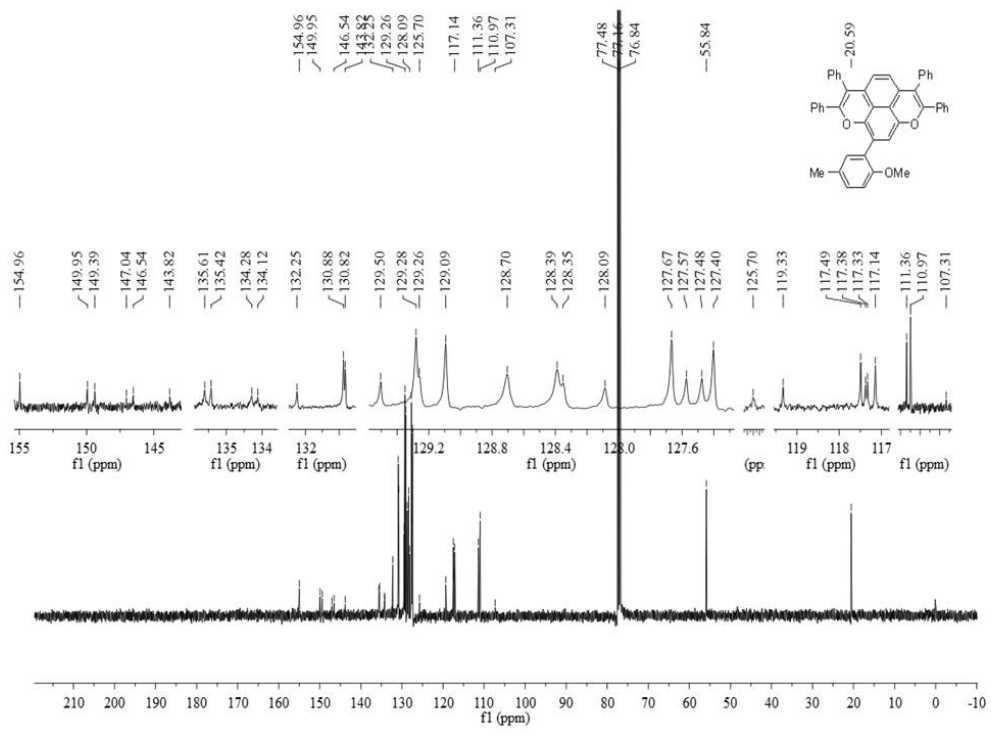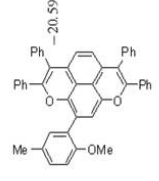



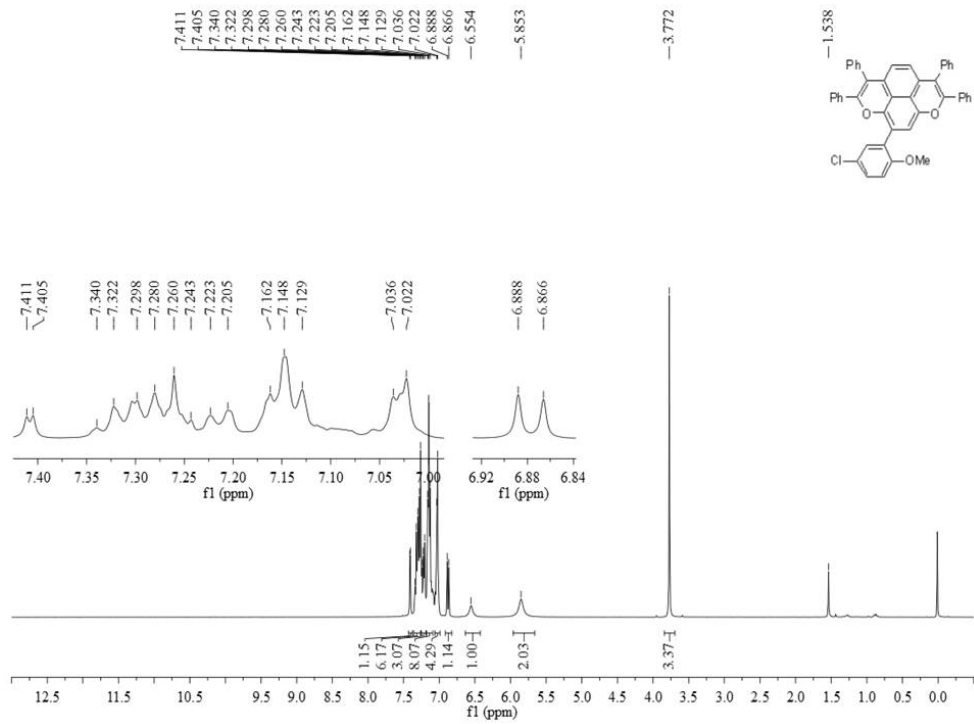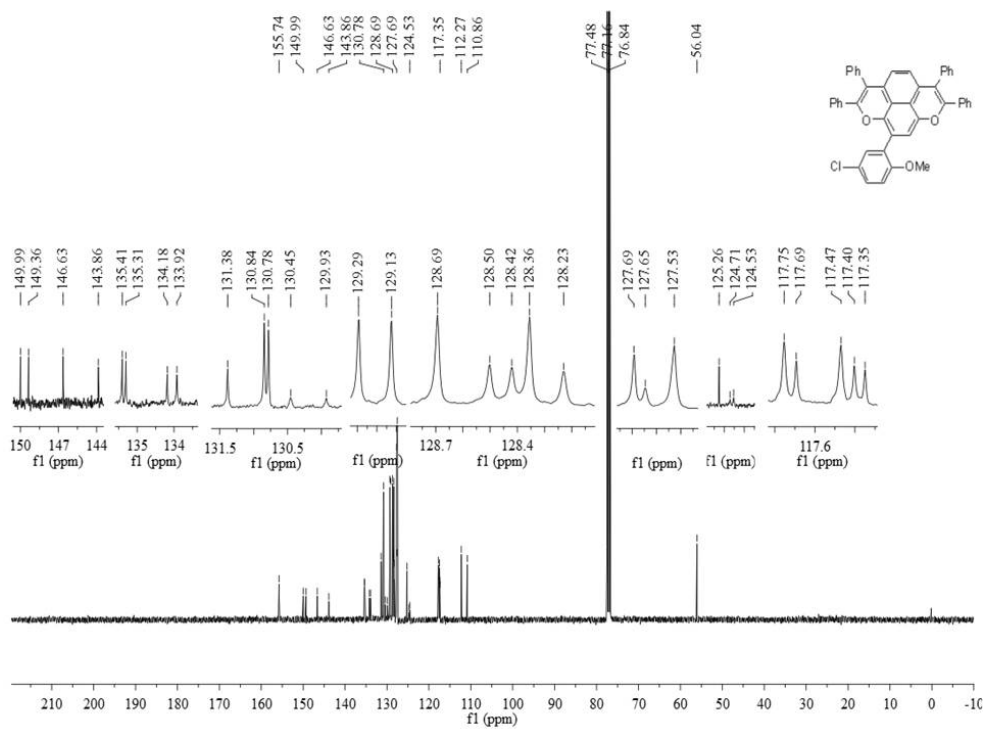

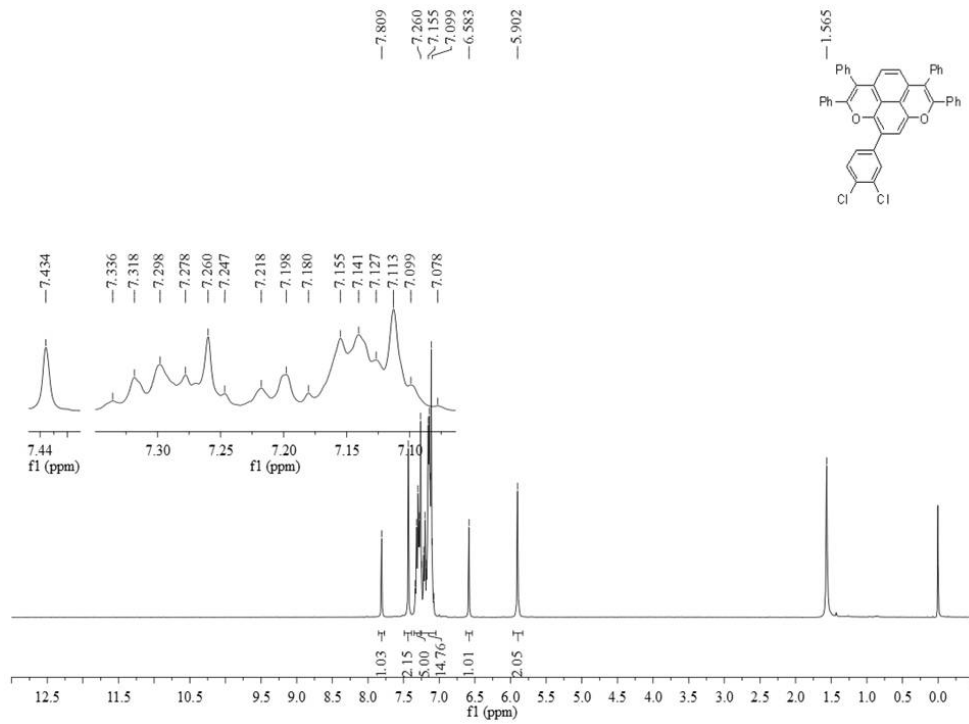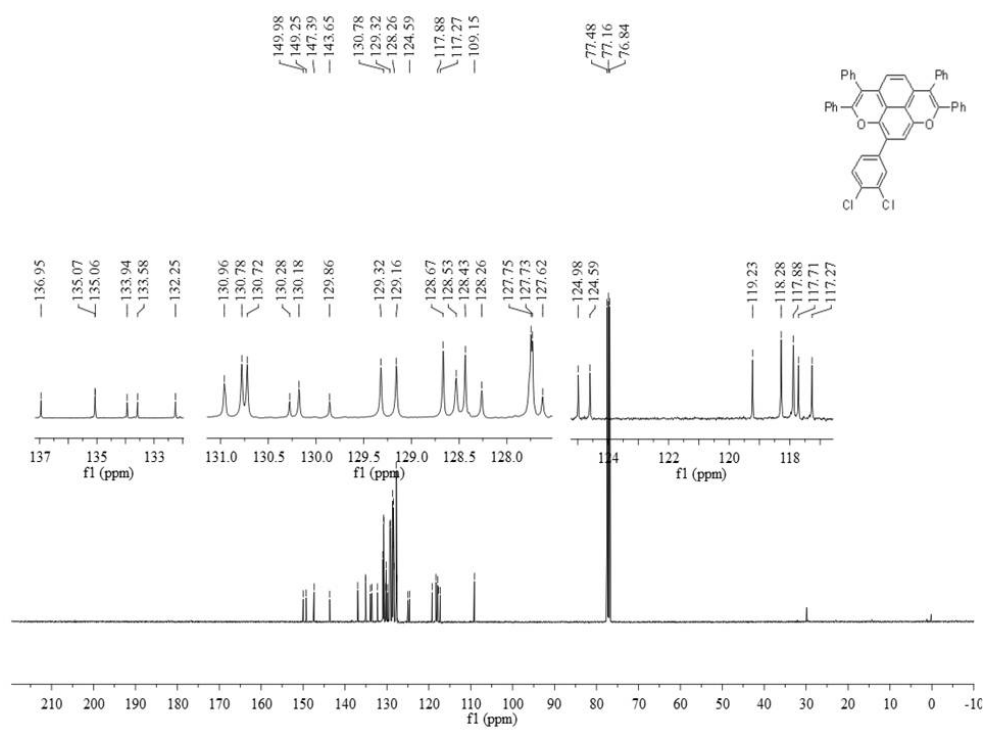

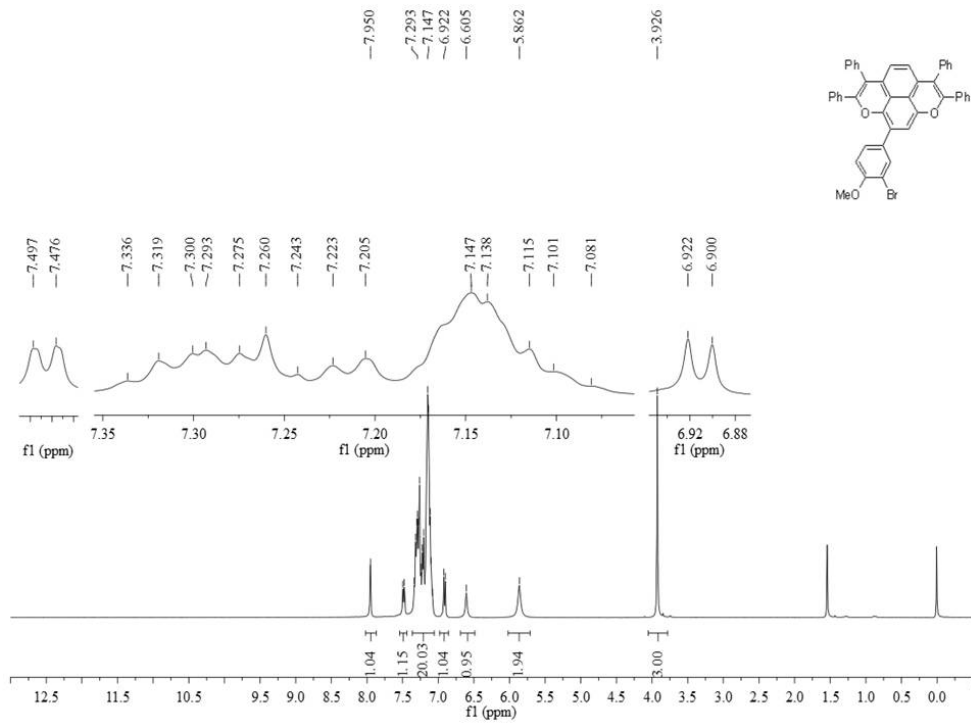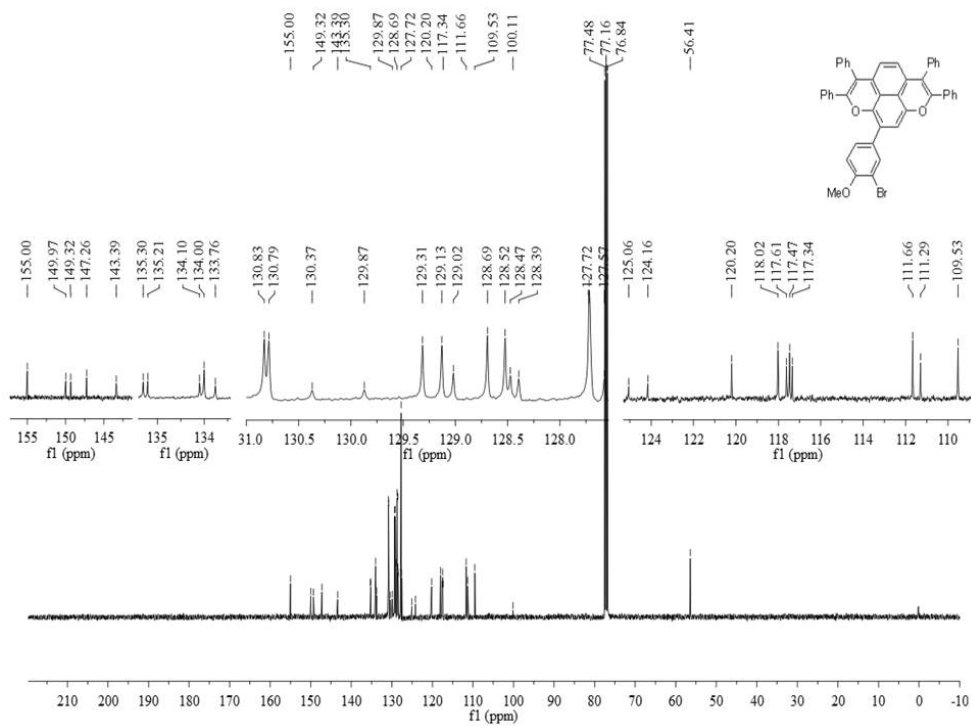

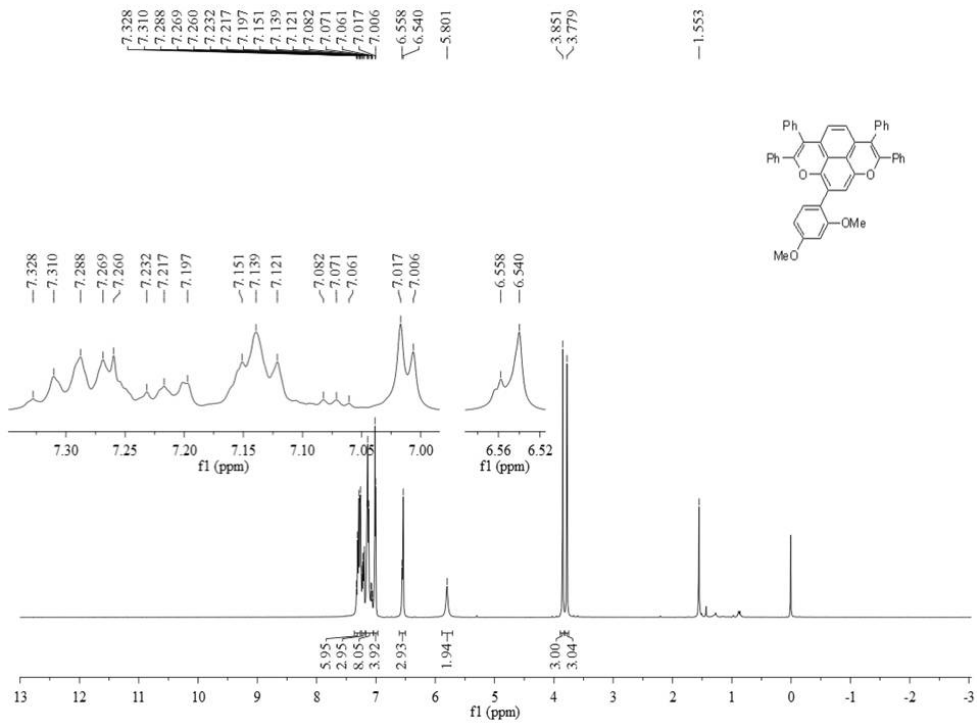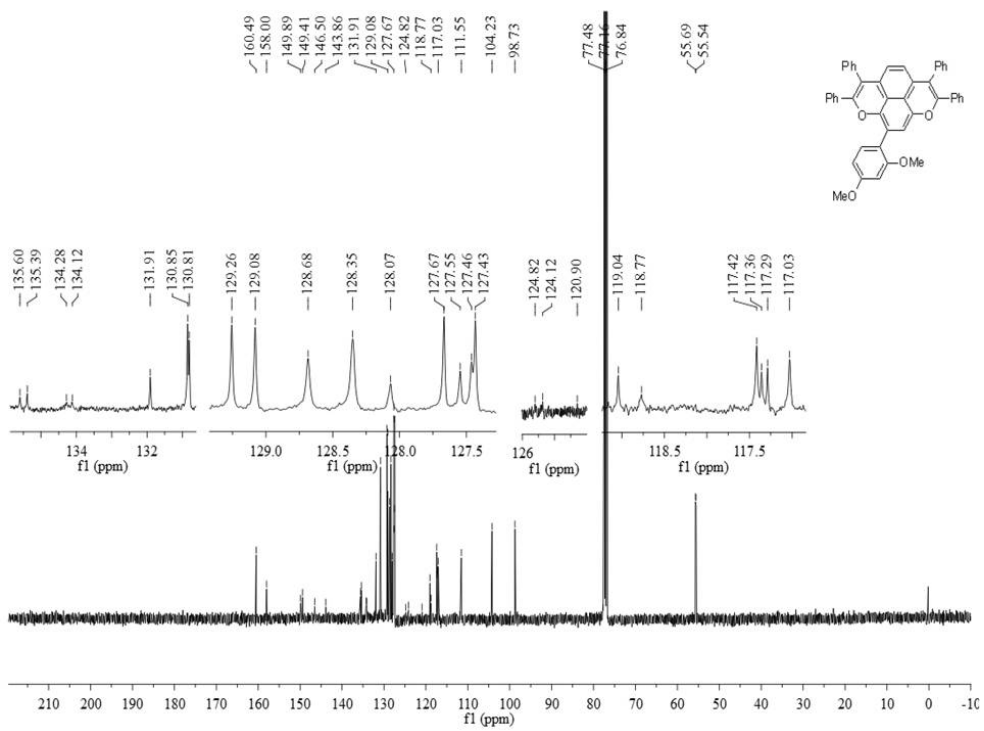

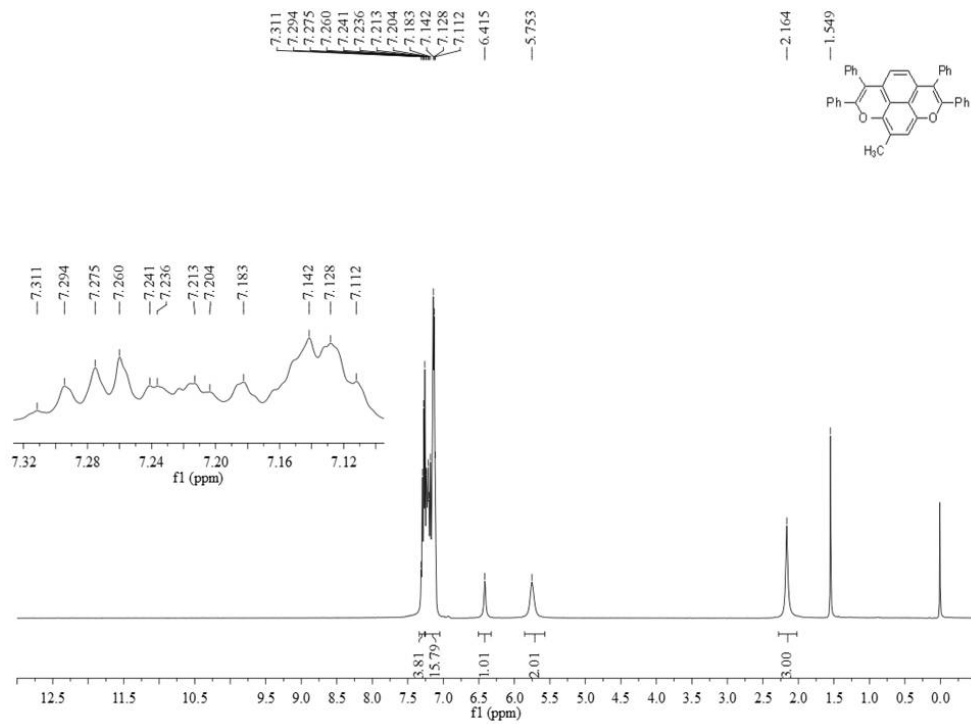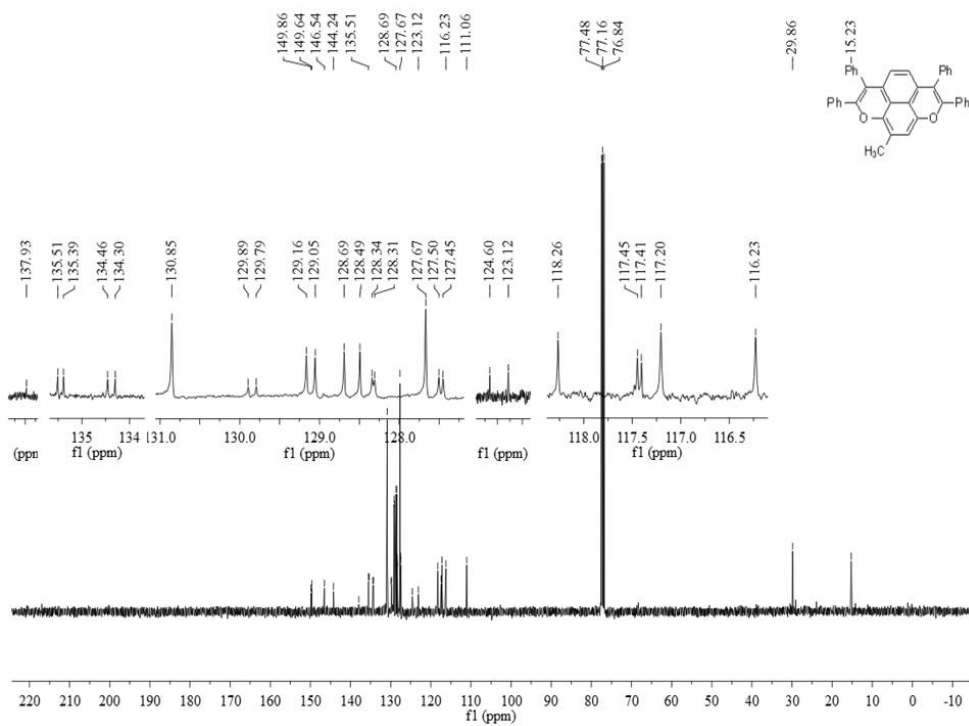

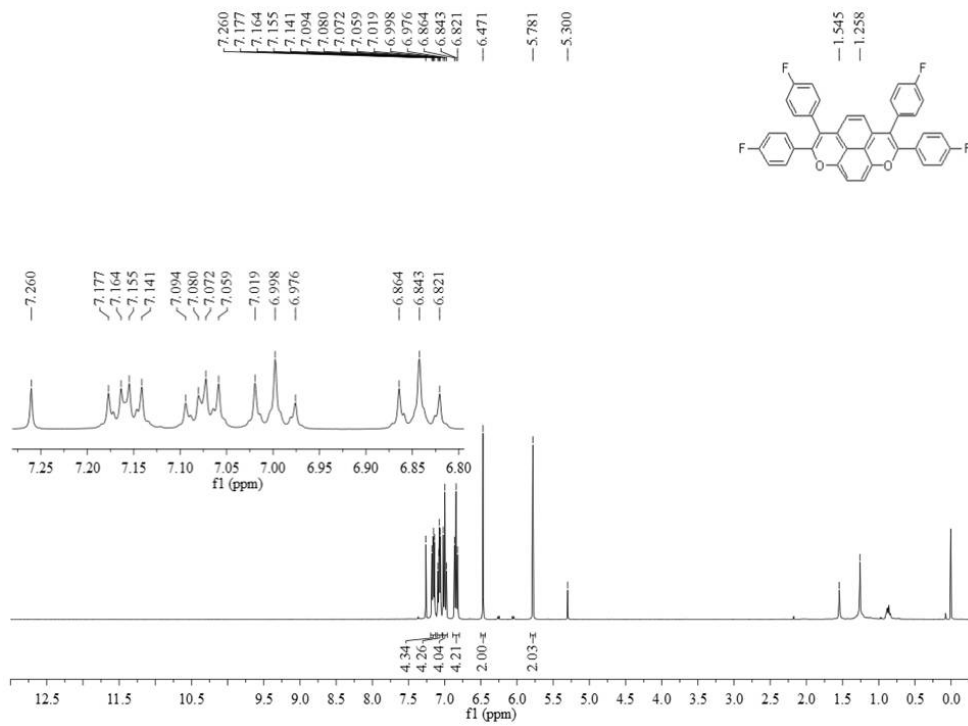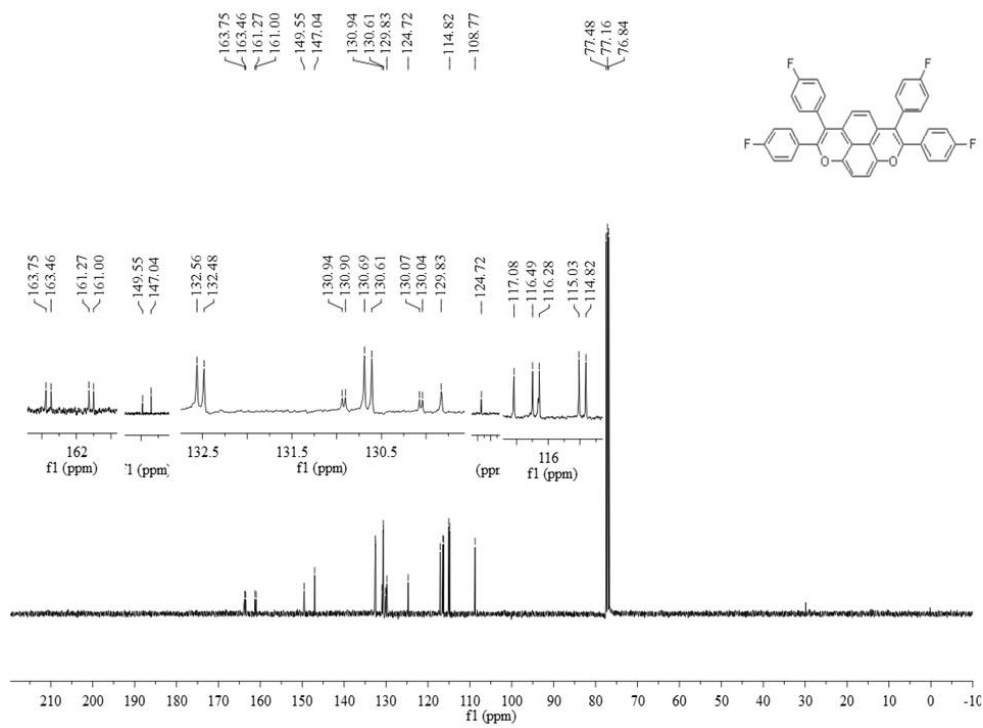

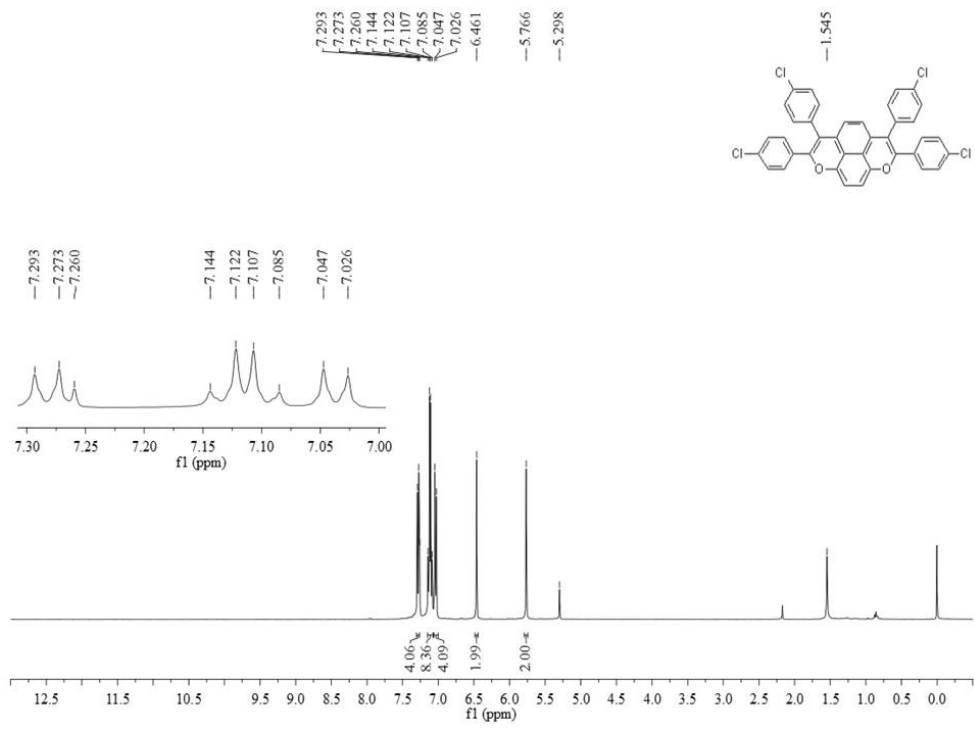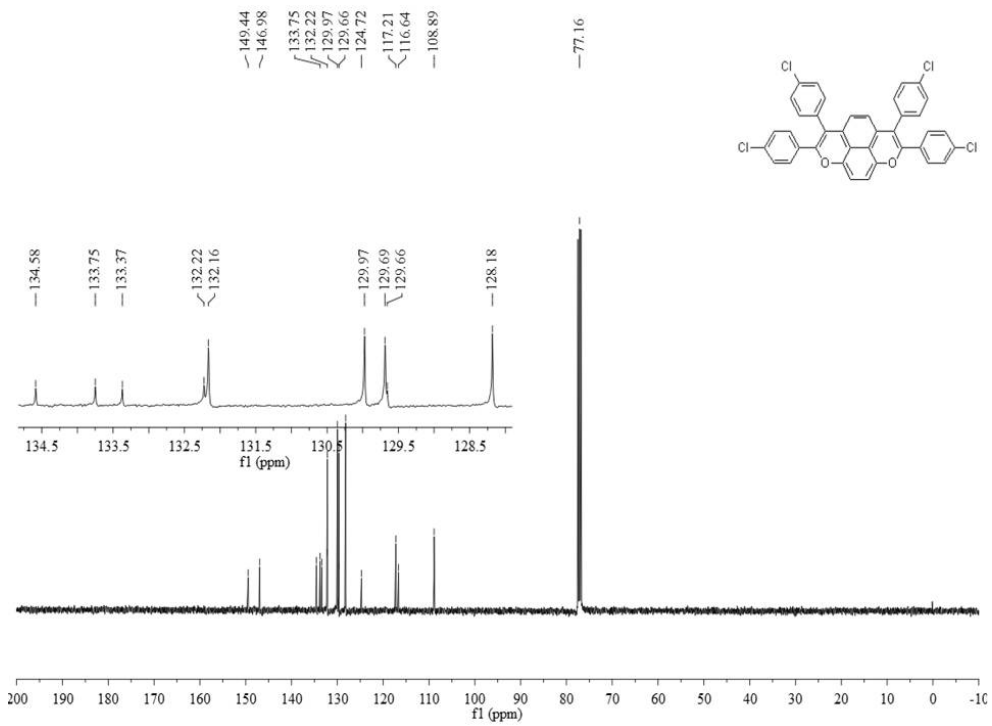

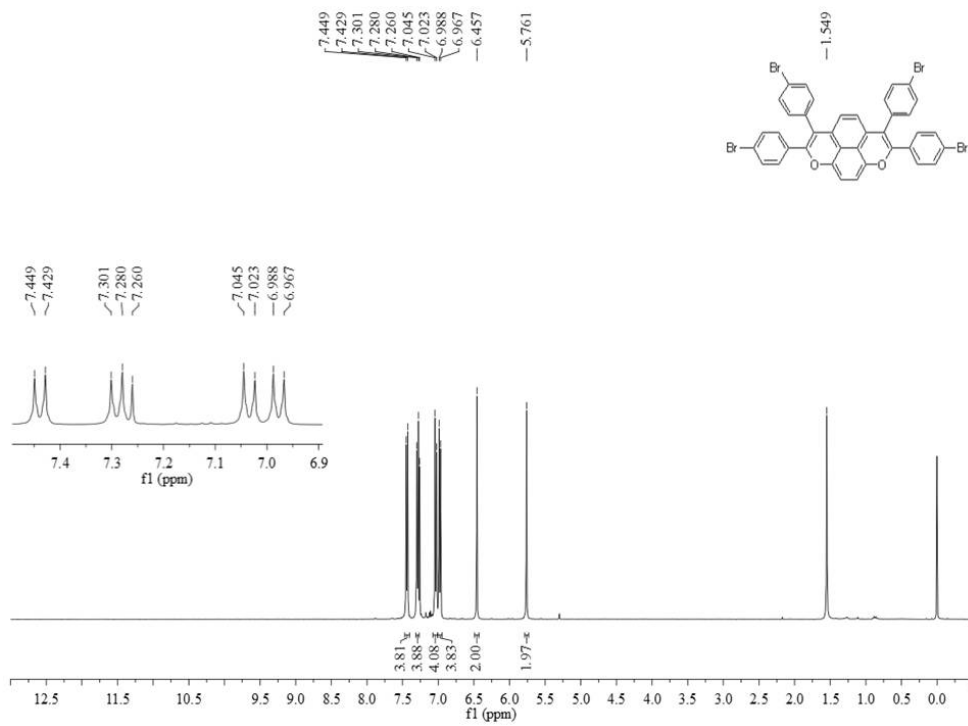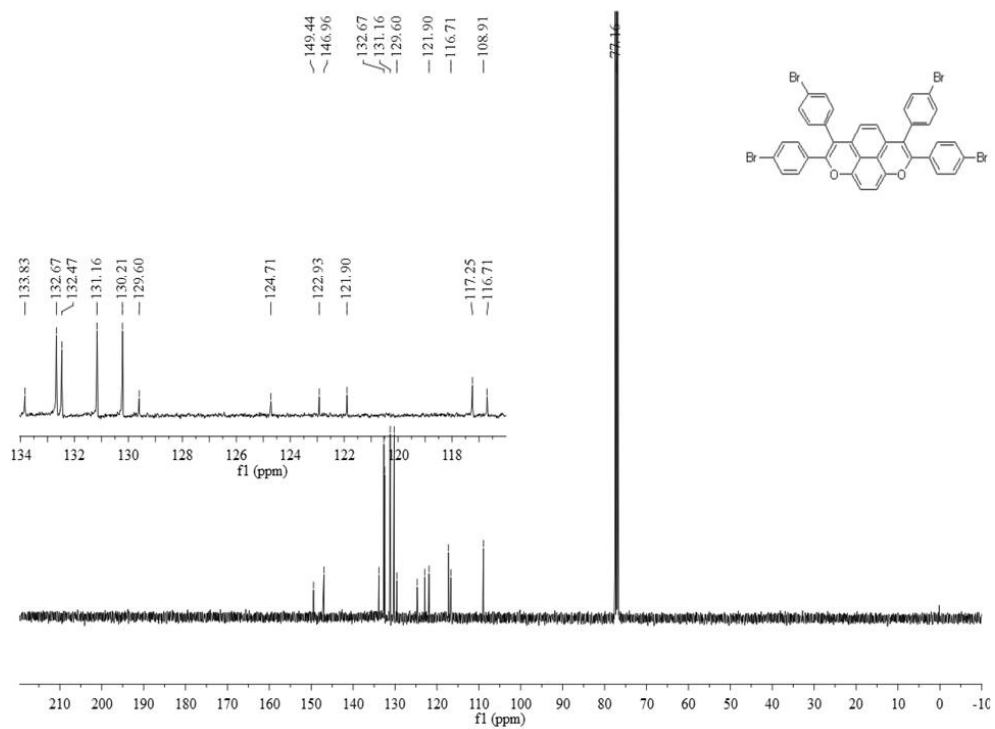



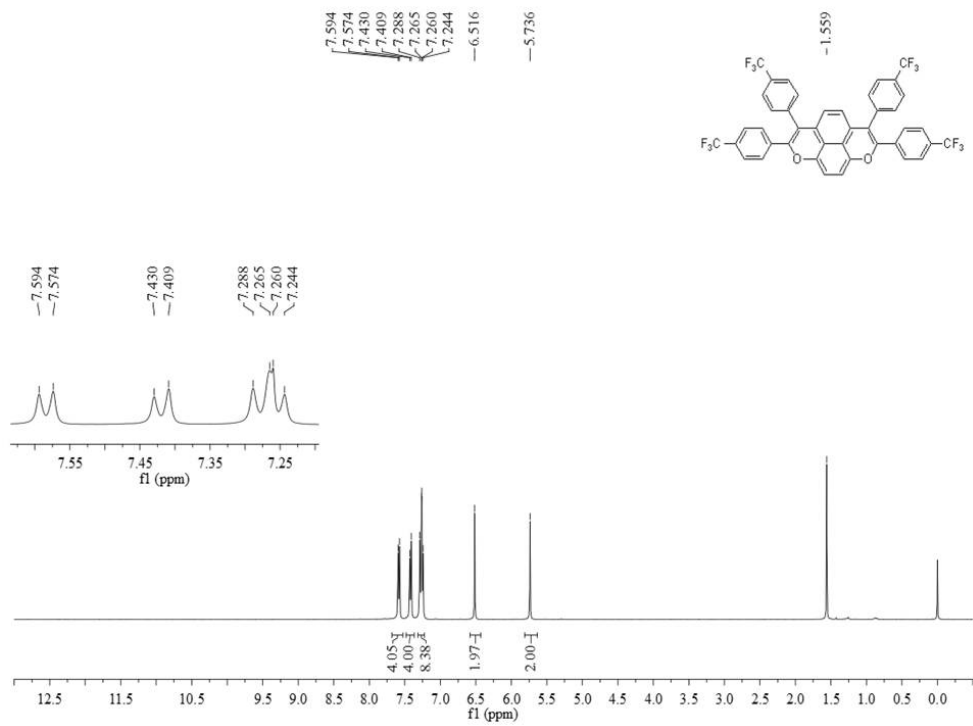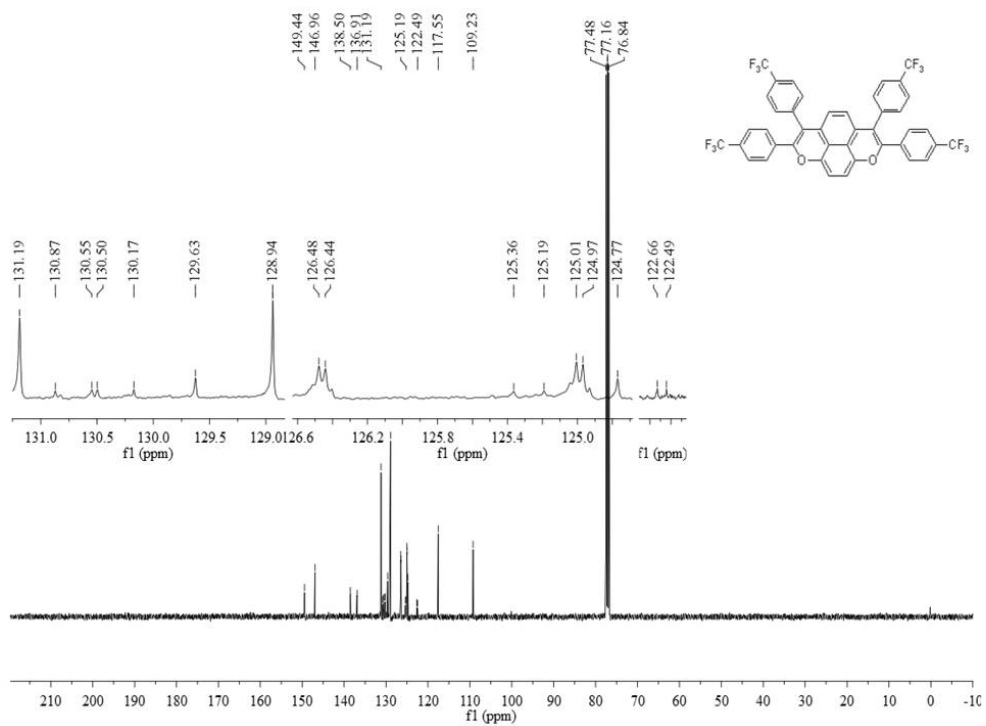

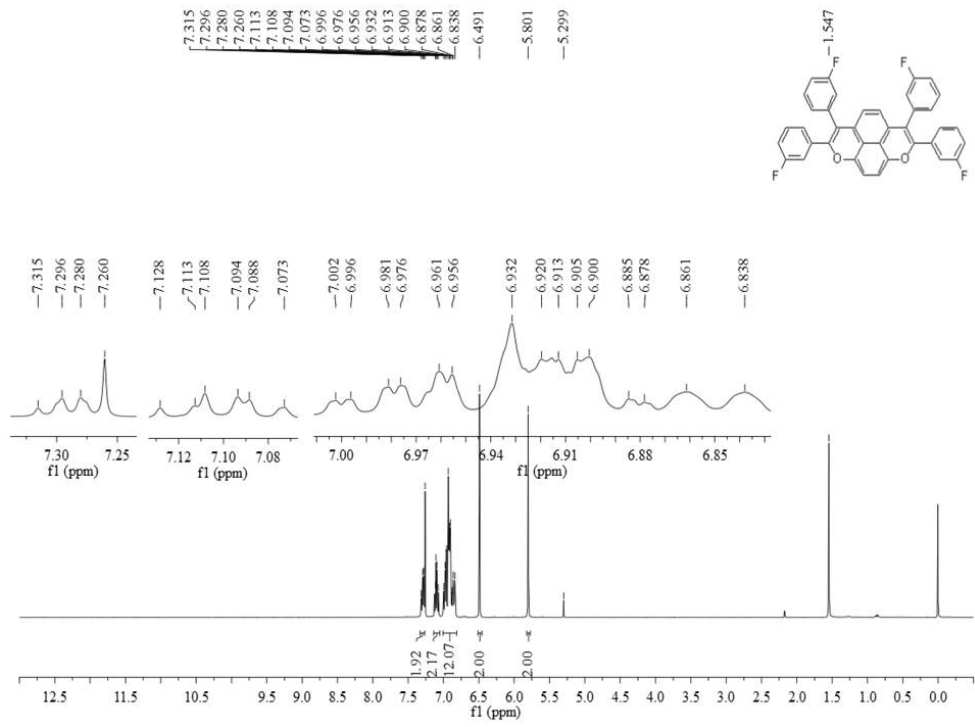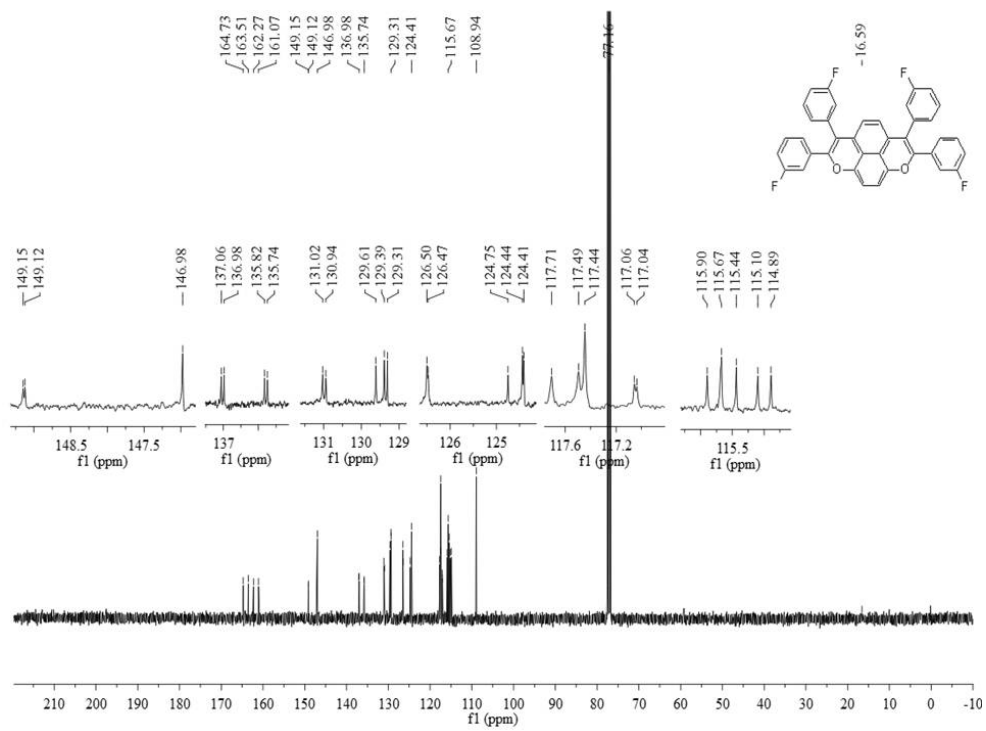

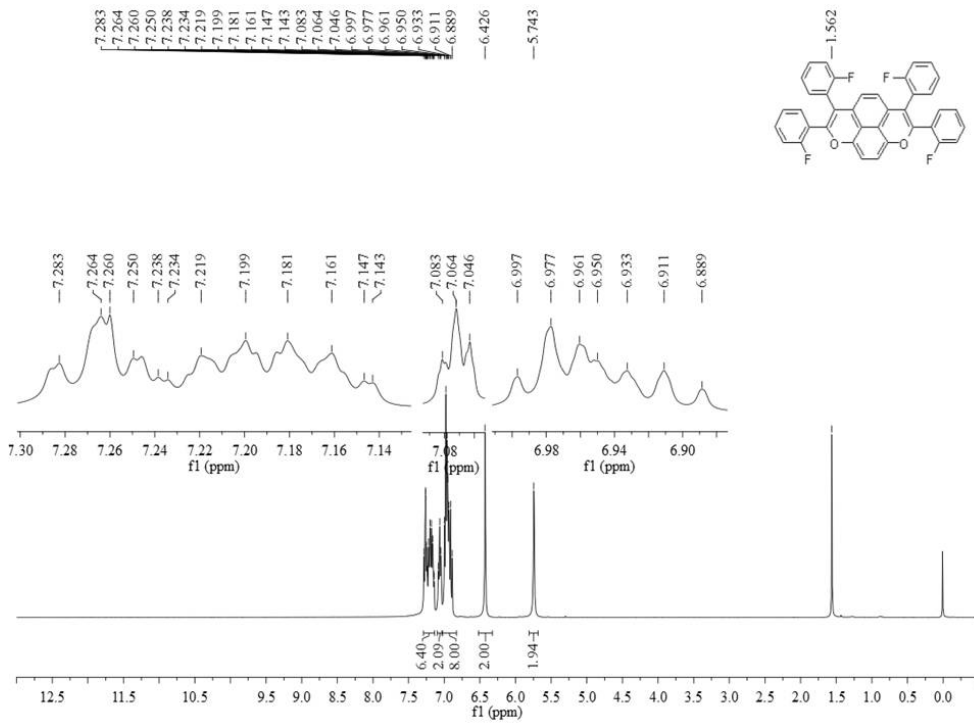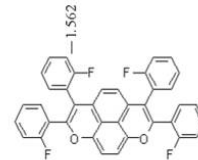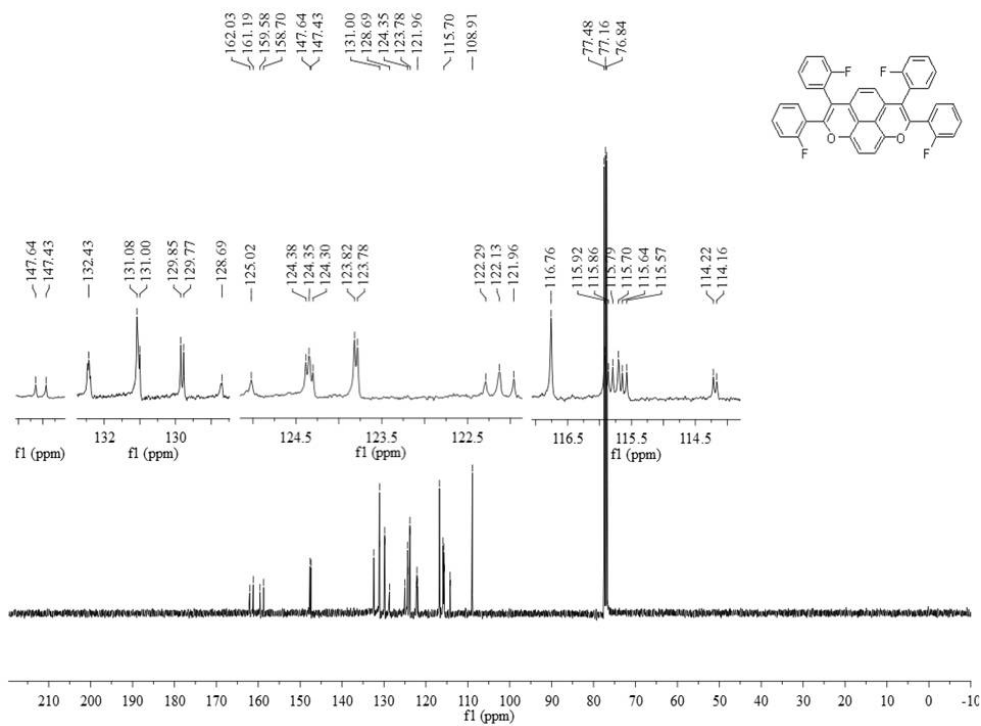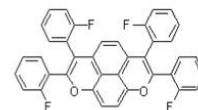

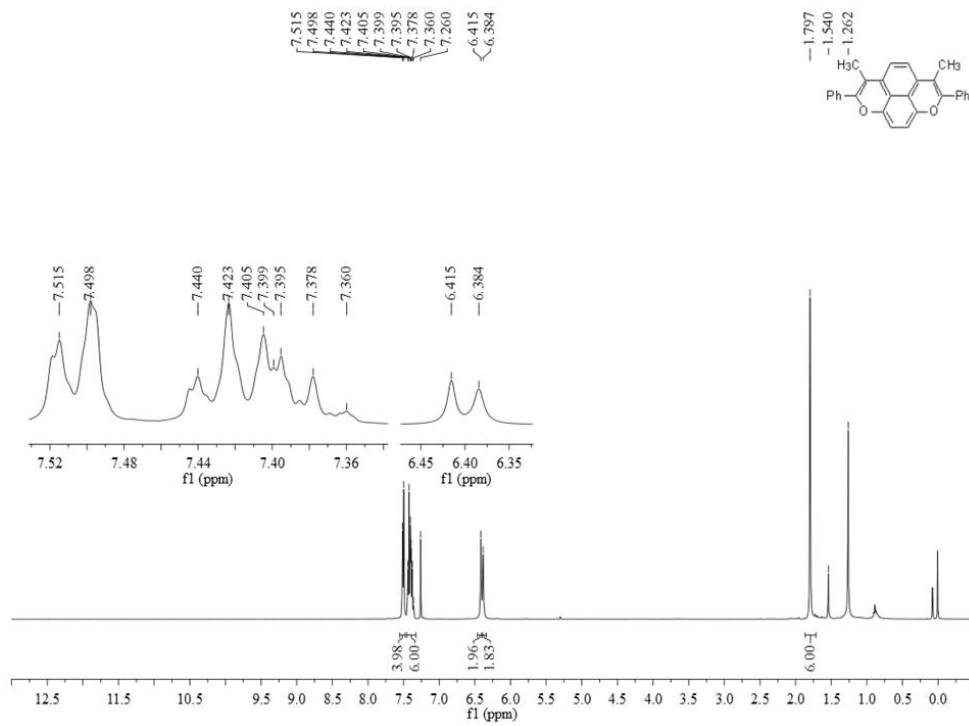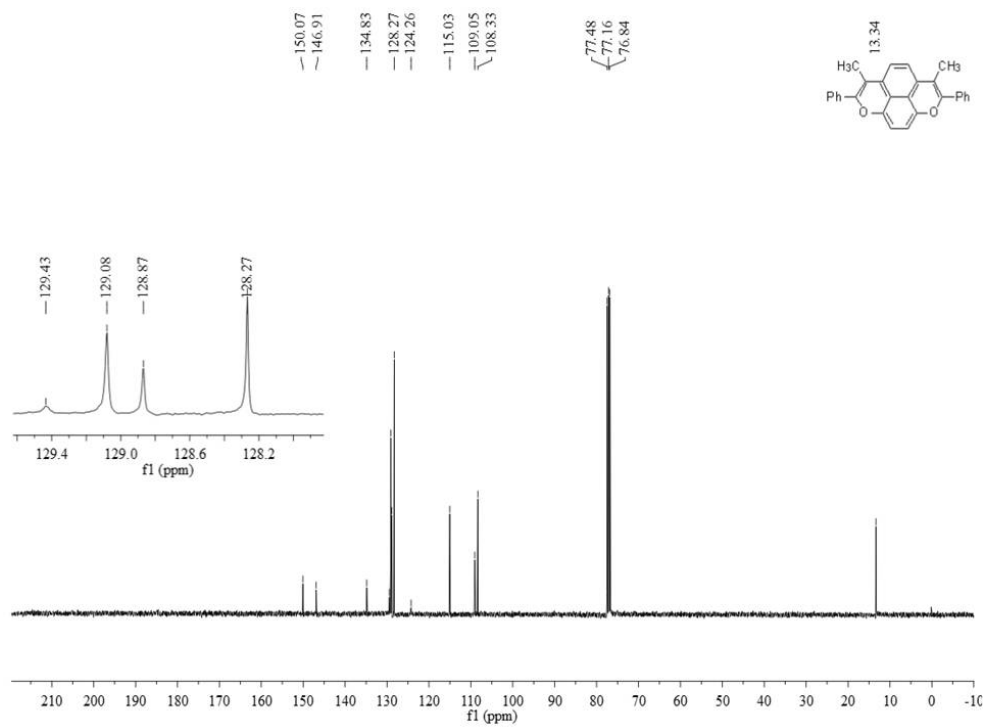

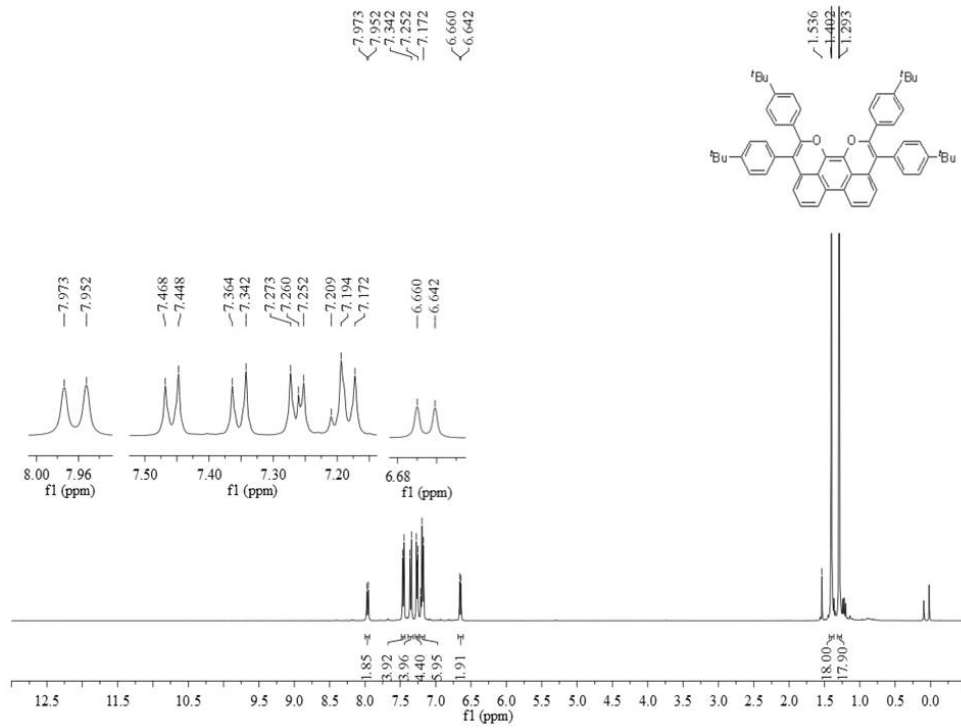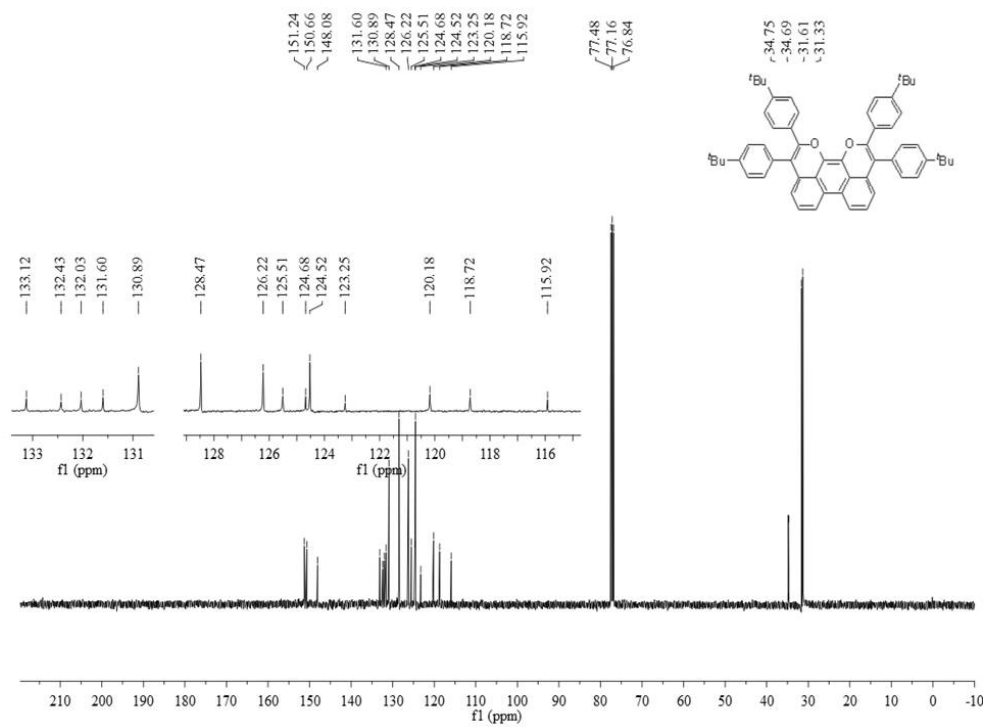

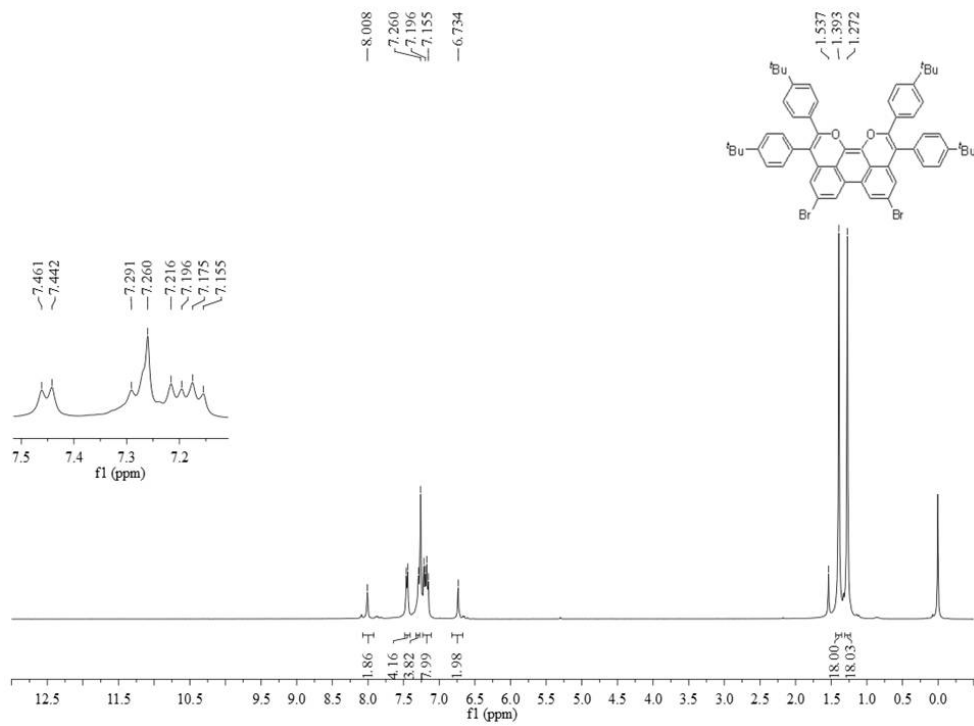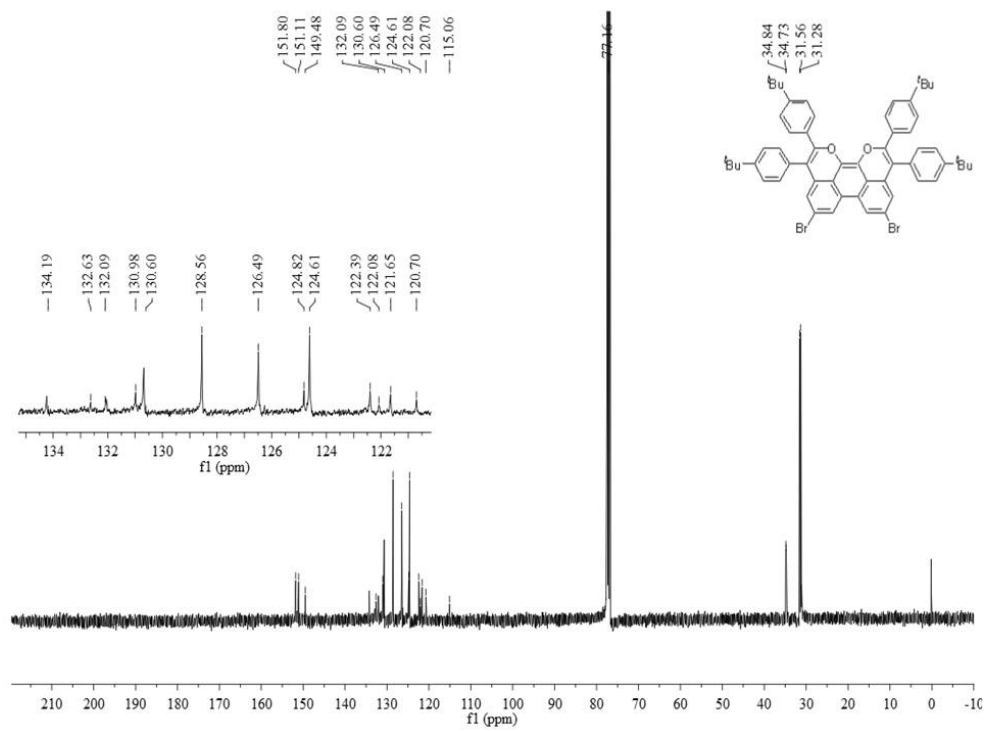

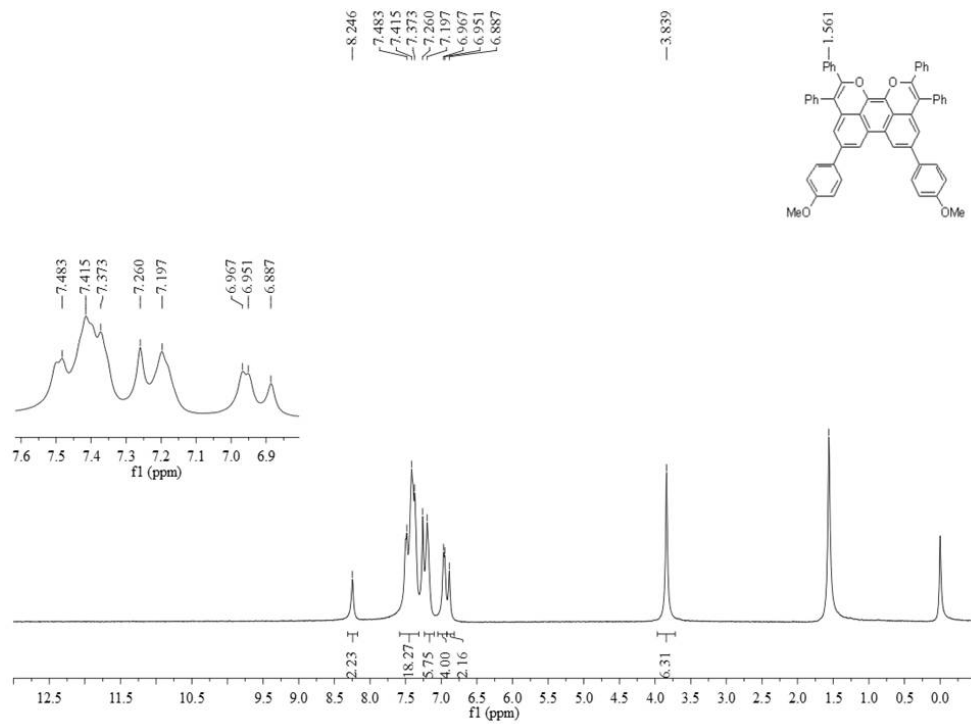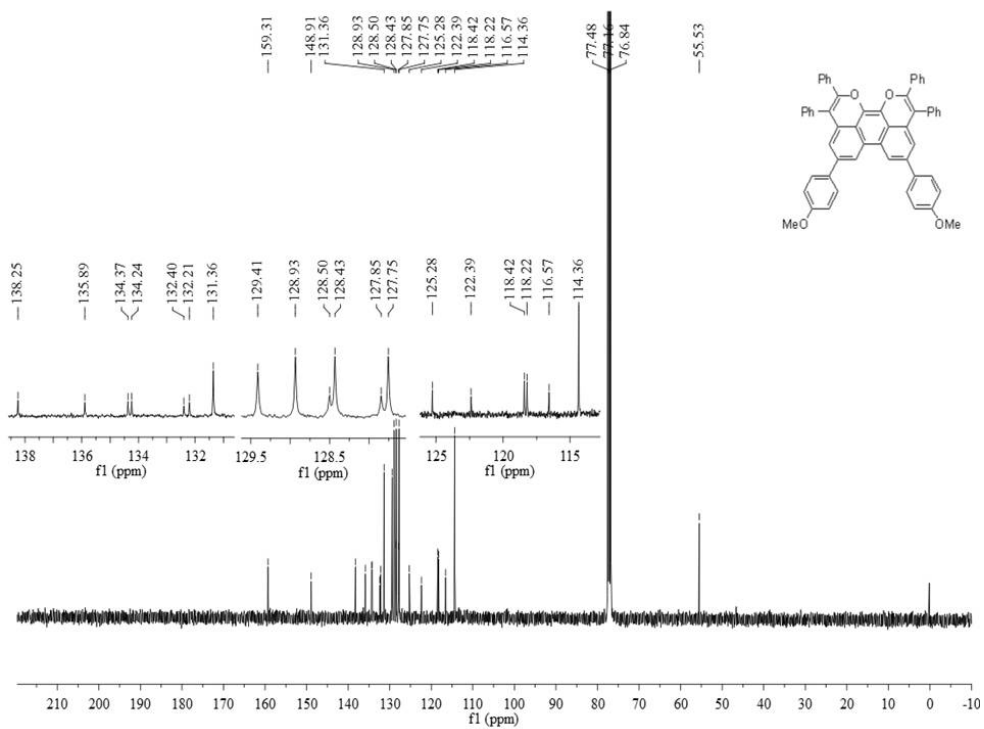

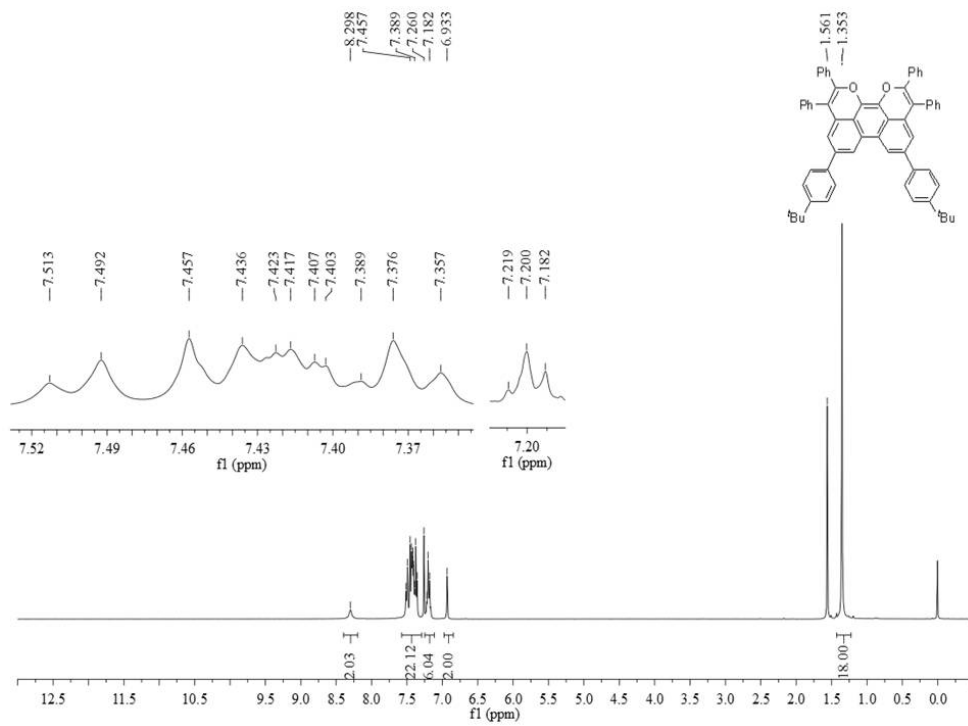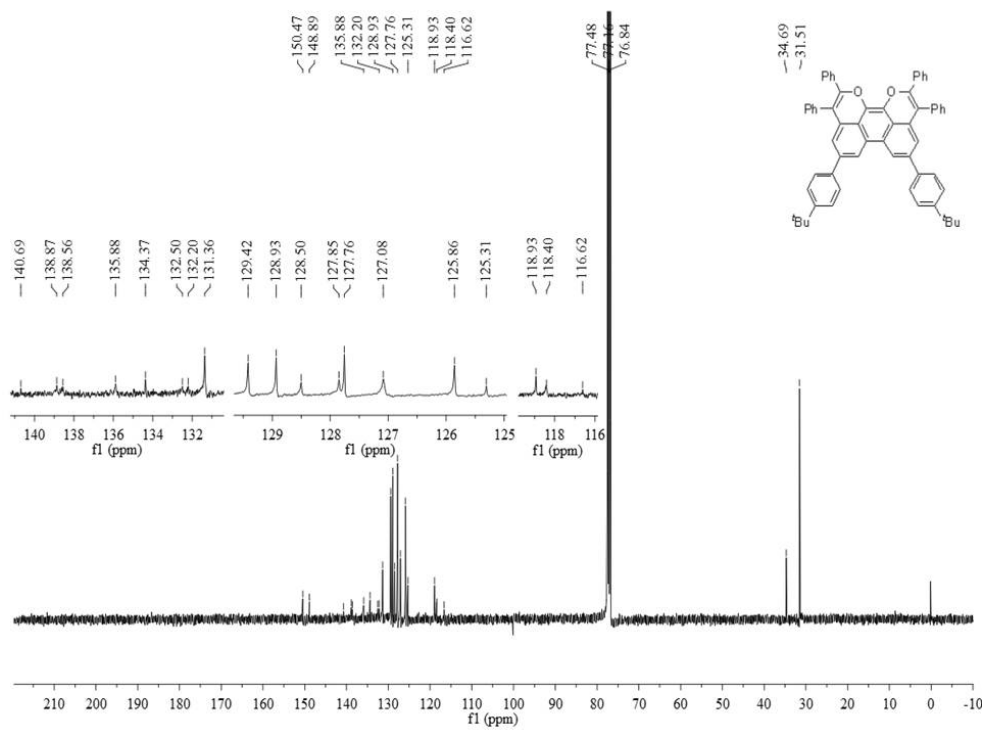



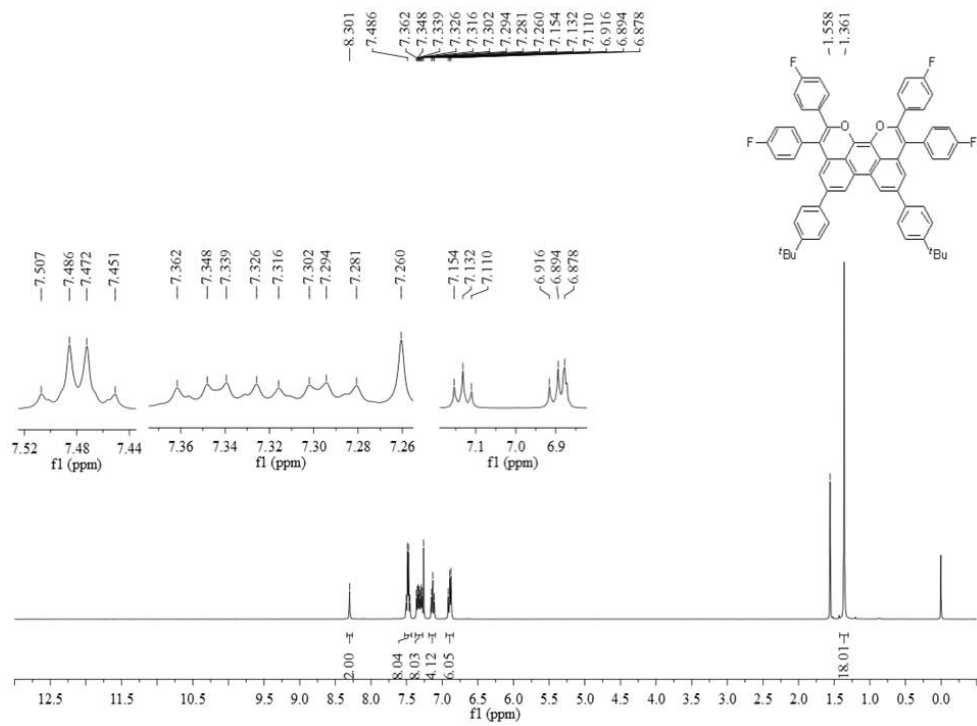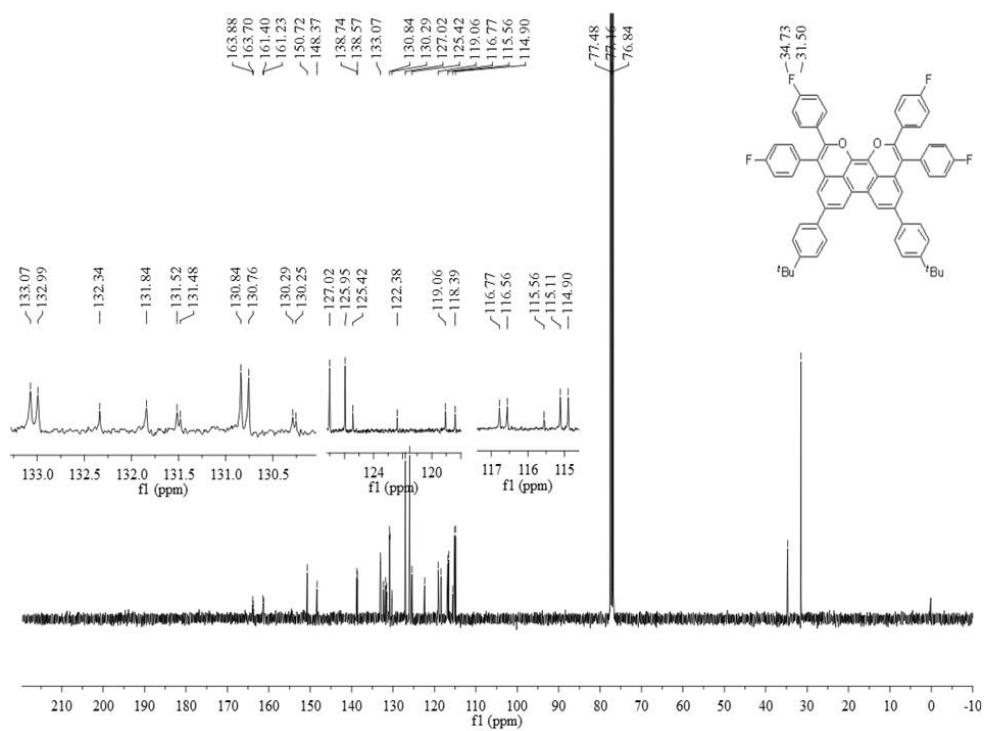

Supplement: c5cc00312a1.pdf [file c5cc00312a1.pdf]
